1        **Multi-omics Analysis of Umbilical Cord Hematopoietic Stem Cells from a Multi-ethnic**  
2        **Cohort of Hawaii Reveals the Transgenerational Effect of Maternal Pre-Pregnancy Obesity**

3

4        Yuheng Du<sup>1</sup>, Paula A. Benny<sup>2</sup>, Yuchen Shao<sup>3</sup>, Ryan J. Schlueter<sup>2</sup>, Alexandra Gurary<sup>2</sup>, Annette  
5        Lum-Jones<sup>4</sup>, Cameron B Lassiter<sup>4</sup>, Fadhl M. AlAkwa<sup>5</sup>, Maarit Tiirikainen<sup>4</sup>, Dena Towner<sup>2</sup>, W.  
6        Steven Ward<sup>2</sup>, Lana X Garmire<sup>1\*</sup>

7

8        1. Department of Computational Medicine and Bioinformatics, University of Michigan, Ann  
9        Arbor, MI

10       2. Department of Obstetrics and Gynecology, University of Hawaii, Honolulu, HI

11       3. Department of Electrical Engineering and Computer Science, University of Michigan, Ann  
12       Arbor, MI

13       4. University of Hawaii Cancer Center, Population Sciences of the Pacific Program-  
14       Epidemiology, Honolulu, HI

15       5. Department of Neurology, University of Michigan, Ann Arbor, MI

16       \*. Corresponding author email: [lgarmire@med.umich.edu](mailto:lgarmire@med.umich.edu)

17

18       **Keywords: obesity, Native Hawaiian, Hematopoietic stem cells, Multi-omics, cord blood,**  
19       **methylation, pregnancy**

20

- 21 **Abbreviation:**
- 22 **BH:** Benjamini-Hochberg
- 23 **BMI:** Body mass index
- 24 **C:** Acylcarnitines
- 25 **DE:** Differential expression
- 26 **DIABLO:** Data Integration Analysis for Biomarker discovery using Latent cOmponents
- 27 **DM:** Differential methylation
- 28 **DMR:** Differentially methylated regions
- 29 **DOHaD:** Developmental Origins of Health and Disease
- 30 **EWAS:** Epigenome-wide association studies
- 31 **FC:** Fold Change
- 32 **FDR:** False positive results
- 33 **KEGG:** Kyoto Encyclopedia of Genes and Genomes
- 34 **LOG:** Logistic regression
- 35 **PANDA:** Preferential Attachment-based common Neighbor Distribution derived Associations
- 36 **PC aa:** Diacyl phosphatidylcholines
- 37 **PC ae:** Acyl-alkylphosphatidylcholines
- 38 **PCC:** Pearson correlation coefficients
- 39 **PPI:** Protein-Protein Interaction
- 40 **RBF:** Radial Basis Function
- 41 **RF:** Random Forest
- 42 **RPART:** Recursive Partitioning and Regression Trees
- 43 **SOV:** Source of variance

- 44 **SVD:** Singular value decomposition
- 45 **SVM:** Supportive Vector Machine
- 46 **kNN:** k-Nearest Neighbour
- 47 **TSS:** Transcription start site
- 48 **uHSCs:** Umbilical cord blood hematopoietic stem cells
- 49 **UMAP:** Uniform Manifold Approximation and Projection
- 50 **VLCAD:** Very long-chain acyl-CoA dehydrogenase
- 51 **WGCNA:** Weighted Gene Co-expression Network Analysis

52

53

54

55

56

57

58

59

60

61

62

63

64

65

66

67 **Abstract**

68 **Background:** Maternal obesity is a health concern that may predispose newborns to a high risk  
69 of medical problems later in life. To understand the transgenerational effect of maternal obesity,  
70 we conducted a multi-omics study, using DNA methylation and gene expression in the  
71 CD34+/CD38-/Lin- umbilical cord blood hematopoietic stem cells (uHSCs) and metabolomics  
72 of the cord blood, all from a multi-ethnic cohort (n=72) from Kapiolani Medical Center for  
73 Women and Children in Honolulu, Hawaii (collected between 2016 and 2018).

74 **Results:** Differential methylation (DM) analysis unveiled a global hypermethylation pattern in  
75 the maternal pre-pregnancy obese group (BH adjusted  $p < 0.05$ ), after adjusting for major clinical  
76 confounders. Comprehensive functional analysis showed hypermethylation in promoters of  
77 genes involved in cell cycle, protein synthesis, immune signaling, and lipid metabolism.

78 Utilizing Shannon entropy on uHSCs methylation, we discerned notably higher quiescence of  
79 uHSCs impacted by maternal obesity. Additionally, the integration of multi-omics data-including  
80 methylation, gene expression, and metabolomics-provided further evidence of dysfunctions in  
81 adipogenesis, erythropoietin production, cell differentiation, and DNA repair, aligning with the  
82 findings at the epigenetic level. Furthermore, the CpG sites associated with maternal obesity  
83 from these pathways also predicted highly accurately (average AUC = 0.8687) between cancer  
84 vs. normal tissues in 14 cancer types in The Cancer Genome Atlas (TCGA).

85 **Conclusions:** This study revealed the significant correlation between pre-pregnancy maternal  
86 obesity and multi-omics level molecular changes in the uHSCs of offspring, particularly in DNA  
87 methylation. Moreover, these maternal obesity epigenetic markers in uHSCs may predispose  
88 offspring to higher cancer risks.

89

## 90 **Introduction**

91 Maternal obesity has emerged as a primary health concern during pregnancy, with its prevalence  
92 alarmingly increasing. According to a study by the Centers for Disease Control and Prevention,  
93 the percentage of women experiencing pre-pregnancy obesity in the United States escalated from  
94 26% to 29% between 2016 and 2019 <sup>1</sup>. Born to mothers with obesity, higher birth weight is  
95 associated with a higher incidence of childhood cancers such as leukemia and neuroblastoma <sup>2,3</sup>,  
96 as well as greater risks of prostate and testicular cancers in men <sup>4-6</sup> and breast cancer in women <sup>7</sup>.  
97 Moreover, maternal obesity may have a transgenerational effect and set the stage for increased  
98 chronic disease susceptibility later in the adulthood of offspring <sup>8,9</sup>. The hypothesis of the utero  
99 origin of diseases proposes that numerous chronic diseases have their origins in the fetal stage,  
100 the earliest phase of human development <sup>10,11</sup>. Some researchers have speculated higher stem cell  
101 burdens in newborn babies born from obese mothers <sup>12</sup>. Altered hormonal environment and  
102 nutrient availability can induce critical changes in fetal stem cells <sup>13</sup>, which may predispose these  
103 cells to malignant transformation, aligning with the idea of the cancer stem cell hypothesis that  
104 cancer cells have stem cell-like properties with an uncontrolled self-renewal program <sup>14-16</sup>. In  
105 particular, a study showed increases in cord blood CD34+CD38- stem cell and CD34+  
106 progenitor cell concentrations with maternal obesity <sup>17</sup>, suggesting that the higher proportions of  
107 stem cells in cord blood may make the babies more susceptible to obesity and cancer risks.  
108 However, so far little work provides the direct molecular links as to how maternal obesity affects  
109 cellular function and increases the disease risk in offspring.  
110 To seek answers in this area, we conducted an epigenome-centered multi-omics study to directly  
111 pinpoint the effect of maternal obesity in umbilical cord blood hematopoietic stem cells  
112 (uHSCs). Epigenetics is chosen as the center of multi-omics integration, as it is both inheritable

113 and susceptible to modification by diseases. Thus, it may serve as a plausible mediator in the  
114 transmission of the effects of maternal obesity to offspring. We incorporate gene expression for  
115 cord blood stem cells and metabolomics data from the cord blood serum as the downstream  
116 readout of epigenetics changes. By elucidating these molecular connections, we provide a  
117 systematic understanding of how maternal obesity during pregnancy can influence the multiple  
118 types of molecular profiles of newborns. Such knowledge may ultimately help develop early  
119 therapeutic interventions at the molecular level to mitigate these transgenerational health risks  
120 due to maternal obesity.

121

122

## 123 **Methods**

124

### 125 **Overview of the maternal pre-pregnancy cohort with baby cord blood**

126 In this study, baby cord blood samples from 72 pregnant women (34 obese; 38 non-obese) who  
127 delivered at Kapiolani Medical Center for Women and Children in Honolulu, Hawaii (2015-  
128 2018) were collected. The study was approved by the Western IRB (WIRB Protocol  
129 #20151223). Patients meeting the inclusion criteria were identified from pre-admission medical  
130 records with pre-pregnancy BMI  $\geq 30.0$  (maternal obesity) or 18.5-25.0 (normal weight).  
131 Pregnant women undergoing elected C-sections at  $\geq 37$  weeks gestation were included, to  
132 minimize confounding events during the labor. Patient exclusion criteria included pregnant  
133 women with preterm rupture of membranes, labor, multiple gestations, pregestational diabetes,  
134 hypertensive disorders, cigarette smokers, infection of human immunodeficiency virus or  
135 hepatitis B virus, and chronic drug use. Demographic and phenotypic information was recorded,

136 including maternal and paternal age, ethnicity, gestational weight gain, gestational age, parity,  
137 and gravidity. For newborns, Apgar scores were documented at 1 minute and 5 minutes post-  
138 delivery. The Apgar score serves as a comprehensive assessment of a newborn's health, with a  
139 normal range considered to be between 7 to 10<sup>18</sup>.

140

#### 141 **Sample preparation and methylation profiling**

142 The baby cord blood sample was collected in the operating room under sterile conditions at the  
143 time of the C-section (Pall Medical Cord Blood Collection Kit containing 25ml citrate phosphate  
144 dextrose). The umbilical cord was first cleansed with chlorhexidine swabs before cord blood  
145 collection. The total volume of collected blood was measured and recorded before aliquoting to  
146 conical tubes for centrifugation. The tubes were centrifuged at 200g for 10 min, and plasma was  
147 collected. The plasma volume was replaced with 2% FBS/PBS. Negative selection reagents were  
148 added to the blood and incubated for 20 min (Miltenyi Biotec, Auburn, CA). The cord blood was  
149 diluted with an equal volume of 2% FBS/PBS. A 20ml aliquot of the diluted blood was layered  
150 over a density gradient (15ml Lymphoprep) and centrifuged at 1200g for 20 min. The top layer  
151 containing an enriched population of stem cells was collected, centrifuged at 300g for 8 min, and  
152 then washed in 2% FBS/PBS. Red blood cells were lysed using ammonium chloride (9:1) with  
153 incubation on ice for 10 min, washed twice, and then resuspended in 100 $\mu$ l of 2% FBS/PBS.

154 Cells were stained with Lineage FITC and CD34 APC for 45 min on ice, washed twice, and then  
155 sorted using the BD FACS Aria III. Hematopoietic stem cells (CD34<sup>+</sup>/CD38<sup>-</sup>/Lin<sup>-</sup>) were collected  
156 and stored at -80°C until DNA/RNA extraction.

157 DNA and RNA were extracted simultaneously using the AllPrep DNA/RNA extraction kit  
158 (Qiagen). DNA purity and concentration were quantified in Nanodrop 2000 and Picogreen assay.

159 Bisulfite conversion of 500 ng DNA was performed using the EZ DNA Methylation kit (Zymo),  
160 followed by sample processing for Infinium HumanMethylation450 bead chips (Illumina)  
161 according to the manufacturer's instructions. Bead chips were analyzed at the Genomics Shared  
162 Resource at the University of Hawaii Cancer Center.

163

#### 164 **Bulk RNA sequencing**

165 A total of 50 RNA samples were prepared for bulk RNA Sequencing. RNA concentration and  
166 RIN score were assayed using Nanodrop 2000 and Agilent Bioanalyzer. A total of 200 ng of  
167 high-quality RNA ( $RIN \geq 7$ ) was subjected to library construction (polyA) and sequenced on  
168 HS4000 (2x100) at the Yale Center for Genome Analysis, Connecticut to obtain at least 25M  
169 paired reads per sample.

170

#### 171 **Methylation data pre-processing**

172 R version 3.6.3 was used for all downstream analyses. Raw intensity data (.idat) were extracted  
173 using the 'ChAMP' package (version 2.16.2) in R<sup>19-22</sup>. Quality control and processing were  
174 performed following the ChAMP pipeline. Background controls were subtracted from the data,  
175 and raw data that did not pass detection P-value of 0.05 were removed. For each CpG site, the  
176 methylation score was initially calculated as the beta value, a fluorescence intensity ratio  
177 between 0 and 1. CpG sites whose probes had known underlying SNPs and association with XY  
178 chromosomes were removed from analysis due to potential confounding. After BMIQ  
179 normalization<sup>23</sup>, the batch effect due to non-biological technical variation caused by experiment  
180 handling was removed using the ComBat function in the ChAMP package, confirmed by the  
181 singular value decomposition (SVD) plot. The M-values for differential analysis were



182 transformed from beta-values using lumi (ver 3.1.4) in R<sup>24-27</sup>. A total of 410,765 CpG sites  
183 remained for downstream analysis after probe filtering, normalization, and batch removal.

184

### 185 **Source of variation analysis and confounding adjustment**

186 To eliminate potential confounding factors of pre-pregnant maternal obesity among the 13  
187 clinical factors, we conducted a source of variation analysis to identify the clinical factors that  
188 significantly contribute to the methylation level variation, as done before<sup>28,29</sup>. The variables with  
189 F statistics greater than 1 (the error value) were determined as confounders and subjected to  
190 confounding adjustment. These factors include the baby's sex, net weight gain during the  
191 pregnancy, maternal age, maternal ethnicity, paternal ethnicity, gravidity, and gestational age. To  
192 adjust for confounding, a linear regression model is built using the 'limma' package to fit  
193 methylation M values of each CpG site, using the confounding factors above. The remaining  
194 residuals on the M values were considered to be confounding-adjusted for the subsequent  
195 bioinformatics analysis of DNA methylation.

196

### 197 **Bioinformatics analysis of differential methylation (DM)**

198 A moderated t-test from the 'limma' R package (version 3.42.2)<sup>30</sup> was used for detecting DM  
199 CpG sites between healthy controls and cases with M values. The p-values were adjusted for  
200 multiple hypotheses testing using Benjamini-Hochberg FDR. CpG sites with FDR <0.05 were  
201 considered statistically significant. To minimize the effect of the gestational age, CpG sites  
202 located within the gestational-age-related differentially methylated regions (DMR) were  
203 removed. A total of 130 DMRs related to gestational age were identified using linear regression  
204 analysis performed with bumphunter<sup>31</sup> across eight public datasets including a total of 248

205 patients.: GSE31781<sup>32</sup>, GSE36829<sup>33</sup>, GSE59274<sup>32,34</sup>, GSE44667<sup>35</sup>, GSE74738<sup>36</sup>, GSE49343  
206<sup>37</sup>, GSE69502<sup>38</sup>, and GSE98224<sup>39,40</sup>. The complete list of DMRs was included in  
207 **Supplementary Table 1**. Hypermethylation and hypomethylation states were defined by the  
208 values of log<sub>2</sub> Fold Change (log<sub>2</sub>FC) of M values in cases compared to controls:  
209 hypermethylation if bigger than 0, and hypomethylation if less than 0. Corresponding genes and  
210 feature locations of these differential CpG sites were annotated using  
211 IlluminaHumanMethylation450kanno.ilmn12.hg19 (ver 0.6.0)<sup>41</sup>.

212

### 213 **KEGG pathway enrichment analysis**

214 ‘gometh’ function from R package “missMethyl” (version 1.26.1)<sup>42–45</sup> was used for KEGG  
215 pathway enrichment<sup>46–48</sup> with DNA methylation data. DM sites were used for pathway  
216 enrichment within five supergroups from KEGG pathways: Metabolism, Genetic Information  
217 Processing, Environmental Information Processing, Cellular Processes, and Organismal Systems.  
218 Pathways with adjusted p-values less than 0.05 were considered significant. Pathway scores for  
219 protein pathways (KEGG: Transcription, Translation, Folding, sorting and degradation) and  
220 immune pathways (KEGG: Immune system) were calculated with averaged beta values from the  
221 promoter region CpG sites.

222

### 223 **Weighted co-expression network analysis**

224 Firstly, we adjusted all beta values with clinical confounders, then summarized the DM CpG  
225 sites at the gene level by averaging the beta values in the promoter regions (those in the TSS200  
226 and TSS1500 promoter regions). Next, we transformed adjusted beta values to adjusted M values  
227 for the downstream adjacency matrix construction. We used adjusted M values for the weighted

228 gene co-expression network analysis (WGCNA) with R package ‘WGCNA’ (version 1.70-3)  
229 <sup>49,50</sup>. The soft threshold for the weighted adjacency matrix with an adjusted  $R^2 > 0.8$  was 7. The  
230 topological overlap matrix was constructed for hierarchical clustering. Modules were identified  
231 by the dynamic tree-cut algorithm. The networks were exported to Cytoscape with an edge  
232 weight greater than 0.03 in each module. The genes with the highest betweenness and degree in  
233 the WGCNA network were identified as the hub genes for different modules.

234

### 235 **Protein-protein interaction network analysis**

236 For the protein-protein interaction (PPI) network analysis, DM genes are used as the inputs and  
237 were mapped on the STRING database (version 10) <sup>51</sup>. Significantly functionally associated  
238 protein pairs were identified using PANDA (Preferential Attachment based common Neighbor  
239 Distribution derived Associations) (version 0.9.9) <sup>52</sup>. KEGG pathways associated with these  
240 protein pairs (in terms of genes) were found using PANDA. The bipartite network graph was  
241 visualized using Cytoscape (version 3.8.1) <sup>53</sup>.

242

### 243 **Stemness score computation**

244 The stemness score was based on Shannon entropy and scaled plasticity, as proposed previously  
245 <sup>54</sup>. Shannon entropy has been widely applied in developmental biology, particularly in stem cell  
246 research <sup>55-57</sup>. The formulas are shown below:

$$Entropy = \sum_{i=1}^N \frac{-\frac{CpG_i}{N} \log\left(\frac{CpG_i}{N}\right)}{\log(N)}$$

$$StemnessScore = \frac{Entropy - \min(Entropy)}{\max(Entropy) - \min(Entropy)}$$

247

248 N is the total number of CpG sites. CpG is represented by the beta value on each CpG probe.

249 The stemness score was calculated for all samples using all remaining 410,765 CpG sites after  
250 the preprocessing. A Wilcoxon rank test was performed between the stemness scores of the  
251 healthy and maternally obese groups.

252

### 253 **Bulk RNA-seq data processing**

254 The Illumina universal adapter regions of raw RNA-seq data were first trimmed using BMAP  
255 (version 38.91)<sup>58</sup>. All raw sequences passed the quality control using fastqc (version 0.11.8)<sup>59</sup>.

256 The trimmed .fastq files were aligned by STAR (version 2.7.0f)<sup>60</sup> to the human Ensembl  
257 genome (Homo\_sapiens.GRCh38.dna.primary\_assembly.fa) and Ensembl annotation

258 (Homo\_sapiens.GRCh38.94.gtf). The gene expression counts were calculated using featureCount

259 <sup>61</sup> from Subread (ver 1.6.4)<sup>62</sup>.

260

### 261 **Differential expression (DE) of RNA-Seq data**

262 The statistically significant DE genes between healthy controls and maternally obese cases were  
263 found adjusting for the same clinical confounders for methylation analysis using the 'DESeq2'

264 (version 1.26.0)<sup>63</sup> and 'limma-voom' function from 'limma' package<sup>30</sup>. The p-values were

265 adjusted for multiple hypotheses testing using BH adjustment. Genes with adjusted p-values less

266 than 0.05 were considered statistically significant.

267

### 268 **Correlation analysis between bulk RNA-seq and methylation data**

269 A subset of 47 patients have done both methylation and RNA-seq assays. Differential expression

270 analysis was done on the bulk RNA-seq data using the 'limma' package, with a threshold of BH

271 adjusted  $p < 0.05$  to be differential genes. Pearson correlation coefficients (PCC) were calculated  
272 between gene expression and methylation beta values from the promoter regions, among the  
273 same patients. As mostly a negative correlation between gene expression and DNA methylation  
274 in the promoter region is expected, genes with a high negative correlation ( $PCC < -0.2$ ) were used  
275 for pathway enrichment using TOPPFUN<sup>64-66</sup>. Top genes of interest were selected with the  
276 absolute value Fold Change  $> 1.5$  in gene expression and gene-methyl correlation  $< -0.3$  for hyper-  
277 and hypo-methylated CpG sites.

278

### 279 **Metabolomics analysis**

280 Metabolomics data were acquired from a previously published study involving 87 patients in the  
281 same cohort from three batches (metabolomics workbench study ID ST001114)<sup>67</sup>. Targeted  
282 metabolites were generated with LC-MS, and untargeted metabolites were generated with GC-  
283 MS. After the removal of compounds missing in more than 10% of samples, a total of 185  
284 metabolites remained, including 10 amino acids (AA), 40 acylcarnitines (C), 35 acyl/acyl  
285 phosphatidylcholines (PC aa), 38 acyl/alkyl phosphatidylcholines (PC ae) and 62 untargeted  
286 metabolites. The raw metabolite data were log-transformed, standardized, normalized using  
287 variance stabilization normalization (VSN), and batch corrected with ComBat function in *sva*  
288 package<sup>68</sup>. Differential metabolites were identified by *limma*, with clinical confounders  
289 adjustment.

290

### 291 **Multi-omics integration on metabolomics, epigenomics, and transcriptomics**

292 A subset of 42 patients have the matched methylation, gene expression, and metabolomics data.  
293 We applied multi-omics integration with Data Integration Analysis for Biomarker discovery

294 using Latent cOmponents (DIABLO) implemented in the mixOmics package<sup>69</sup>. DIABLO finds  
295 the correlated consensus latent variables among different omics in the supervised manner. Top  
296 DIABLO features for each omic were selected based on the loading values. We integrated the  
297 pathway-level methylation, gene, and metabolite interaction using pathview<sup>70</sup>.

298

### 299 **Evaluation of maternal pre-pregnancy obesity biomarkers in cancer prediction**

300 We collected Infinium HumanMethylation450 data for a total of 14 cancer datasets (adjacent  
301 normal samples > 10): BLCA, BRCA, COAD, ESCA, HNSC, KIRC, KIRP, LIHC, LUAD,  
302 LUSC, PAAD, PRAD, THCA, UCEC from The Cancer Genome Atlas (TCGA data portal:  
303 <https://portal.gdc.cancer.gov/>). In total, 6428 samples were obtained, consisting of 5715 tumor  
304 samples and 713 adjacent normal tissues. To build the TCGA cancer classification model with  
305 maternal obesity biomarkers, we selected 186 hypermethylated CpG sites from the promoter  
306 regions of the genes involved in the top five significant pathways based on the missMethyl  
307 KEGG enrichment results. This includes cell cycle, ribosome, nucleocytoplasmic transport,  
308 ribosome biogenesis in eukaryotes, and mTOR signaling pathway.

309 To handle imbalanced data, we randomly down sampled tumor samples to match the number of  
310 adjacent normal samples with twenty repetitions for each cancer using the ‘downSample’  
311 function from ‘caret’ R package<sup>71</sup>. We split the training and testing samples at a ratio of 80/20  
312 for each augmented dataset. We constructed five classification models with 5-fold cross-  
313 validation using ‘caret’ R package<sup>71</sup>, including logistic regression (LOG), Random Forest (RF),  
314 Supportive Vector Machine (SVM) with Radial Basis Function (RBF) kernel, GLMNET, and k-  
315 Nearest Neighbour (kNN). We report accuracy, sensitivity, specificity, and F1 score for model  
316 performance as done before<sup>72</sup>.

317

## 318 **Results**

319

### 320 **Overview of study design and cohort characteristics**

321 This study aims to investigate the transgenerational effect of pre-pregnancy maternal obesity on  
322 offspring. A total of 72 patients who elected to deliver full-term babies through C-sections were  
323 recruited from Kapiolani Medical Center for Women and Children in Honolulu, Hawaii from  
324 2016 to 2018. Among them, 38 deliveries are in the healthy control group and 34 are cases with  
325 pre-pregnancy maternal obesity. We excluded natural virginal births, to avoid its potential  
326 confounding effect on multi-omics profiles. We also carried out stringent recruitment selection  
327 criteria, including matching the mothers' ages as much as possible, as well as similar net  
328 gestational weight gain to minimize its confounding effect over maternal pre-pregnancy maternal  
329 obesity. The overall study design is shown in **Figure 1**. Briefly, upon collecting the blood  
330 samples, umbilical cord blood hematopoietic stem cells (uHSCs) were enriched by FACS sorting  
331 with CD34+CD35-LIN- markers (see **Methods**). We extracted DNA and RNA from these  
332 uHSCs for Illumina 450k array based DNA methylation and bulk RNA-Seq sequencing  
333 respectively. The plasma from these cord blood samples was subject to untargeted metabolomics  
334 assays using GC-MS and targeted metabolomics assays using LC-MS<sup>67</sup>. Given the rationale  
335 that DNA methylation could be the mediator for exerting the transgenerational effect of maternal  
336 obesity<sup>73,74</sup>, we carried out multi-omics data integration analysis in the DNA methylation-centric  
337 manner.

338

339 The demographic details and clinical information of these patients are summarized in **Table 1**.  
340 The distributions of the most representative variables are shown in **Figure 2**. Among categorical  
341 demographic variables, the distribution of baby sex had no statistical difference between obese  
342 and health groups, whereas the ethnicity distributions among mothers and fathers, parity and  
343 gravidity are statistically different ( $P < 0.05$ ) between the two groups (**Figure 2A-2E**). Besides  
344 maternal pre-pregnancy BMI, other maternal parameters such as maternal age, gestational week,  
345 net weight gain and hemoglobin are also not statistically significantly different between the two  
346 groups per study design (**Figure 2F-2I, Table 1**). While mothers of Asian ethnicity are the  
347 majority in the control group, NHPs account for the majority of the maternal-obese group,  
348 revealing the health disparity issue known in the state of Hawaii<sup>75</sup>. Moreover, the control group  
349 has lower parities and gravidities, compared to the cases. Babies born to obese mothers show  
350 significantly higher ( $P < 0.05$ ) body weights compared to the control group, as expected<sup>76</sup>. Other  
351 parameters including the baby gender, head circumference, body length, and APGAR score at 5  
352 min after birth are not statistically significantly different between case and control groups  
353 (**Figure 2J-2M**).

354

### 355 **Global hypermethylation pattern revealed by CpG level methylation analysis**

356 For scientific rigor, it is critical to adjust for confounding in DNA methylation association  
357 analysis<sup>77</sup>. Thus we performed the source of variance (SOV) analysis on the beta values of the  
358 DNA methylation with respect to physiological and phenotypic information, in order to assess  
359 potential confounding factors systematically<sup>28,29,77</sup>. As shown in **Figure 3A**, marginal F-  
360 statistics in the SOV analysis show that the dominating contribution to DNA methylation  
361 variation is maternal pre-pregnancy obesity status, confirming the quality of the study design



362 which aimed to minimize other confounders' effect. The other minor confounding factors  
363 include baby sex, maternal age, maternal ethnicity, net weight gain during pregnancy, paternal  
364 ethnicity, gravidity, and gestational age (F-statistics>1). After adjusting these factors by linear  
365 regression, all have reduced F-statistics of less than 0.5 (**Figure 3B**) except maternal pre-  
366 pregnancy obesity, confirming the success of confounding removal.

367 Next, we conducted differential methylation (DE) analysis on the confounding adjusted DNA  
368 methylation data (**Methods**). We observed a global hypermethylation pattern in pre-pregnancy  
369 obese samples, with 10,254 hypermethylated vs. 5394 hypomethylated CpG sites (**Figure 3C**).  
370 The top 20 differentially hypermethylated and hypomethylated CpG sites are reported in **Table**  
371 **2**, respectively. These CpG sites are related to a wide variety of biological functions, including  
372 inflammation (CD69, ADAM12), transcription factors (ZNF222, HMG4, LHX6, TAF3),  
373 proliferation and apoptosis (HDAC4, DHRS4, LRCH3, SAFB2, CRADD, EBF3, PRKAR1B).  
374 Some top DM CpG sites are directly associated with obesity, including HDAC4<sup>78</sup> and PLEC1<sup>79</sup>.  
375

376 We further examined the distributions of these differentially methylated sites, relative to the CpG  
377 island regions and promoter proximity. (**Figure 3D-E**). A big fraction (38.7%) of the DM sites  
378 are located in CpG islands<sup>80,81</sup>, significantly higher than that from the Illumina 450K annotation  
379 (P<2E-16). CpG islands are more frequent in the hypermethylated sites (41.3%) than in the  
380 hypomethylated sites (33.6%), which is consistent with the global hypermethylation pattern.  
381 Relative to gene localization, DM sites are most frequent (32.1%) in the promoter regions  
382 (including 16.8% and 15.3% in TSS200 and TSS1500 respectively) as expected.  
383

384 **Functional analyses reveal the association between maternal obesity and cell cycle, immune**  
385 **function and metabolic changes in the cord blood of offspring**

386 To investigate the biological functions related to the epigenome alternation, we conducted  
387 systematic analysis of DM sites employing multiple methods: KEGG pathway enrichment  
388 analysis, Weighted Gene Co-expression Network Analysis (WGCNA), and Protein-Protein  
389 Interaction (PPI) network analysis.

390

391 KEGG pathway enrichment analysis on hypermethylated CpG sites identified five significant  
392 pathways with  $FDR < 0.05$  (**Figure 4A**), including the cell cycle, ribosome, nucleocytoplasmic  
393 transport, ribosome biogenesis in eukaryotes, and mTOR signaling pathway. Cell cycle,  
394 ribosome, and nucleocytoplasmic transport pathways are essential to normal cell functioning.  
395 mTOR signaling pathway coordinates the nutrient-mediated metabolism, immune responses and  
396 cell cycle progression, and dysregulation of mTOR could lead to various diseases such as cancer  
397 and obesity<sup>82</sup>. There was no significantly enriched pathway emerging from hypomethylated  
398 CpG sites. The maternally obese group shows significantly higher methylation levels in KEGG  
399 protein synthesis and immune system pathway collections compared to the control group,  
400 indicating repression in immune response as well as translation and protein synthesis (**Figure**  
401 **4B-C**). Similarly, we further explored the differential potential, or stemness, of umbilical cord  
402 Hematopoietic Stem Cells (uHSCs). We first confirmed the homogeneity of uHSCs by single-  
403 cell RNA sequencing UMAP plot (**Supplementary Figure 2**). We calculated the cell stemness  
404 scores using the DNA methylation beta values similar to others<sup>83</sup>. uHSCs derived from the  
405 maternally obese group exhibit significantly elevated stemness scores ( $P < 0.01$ ) in comparison to  
406 the control group (**Figure 4D**), confirming the results in KEGG pathway analysis.

407  
408 Next, we applied WGCNA to cluster co-regulation of gene-level methylation, by averaging CpG  
409 sites to affiliated genes (see **Methods**). Five co-expression modules are identified, using the M-  
410 values adjusted for clinical confounders (**Supplementary Figure 1A**), and all modules show  
411 positive correlations with maternal obesity except one. The largest turquoise module (**Figure 4E**)  
412 is related to cell cycle, protein synthesis, and transport and vesicle trafficking pathways through  
413 pathway enrichment analysis. Some hub genes in this module are identified, including INTU,  
414 ANAPC7, and AGBL5. These genes were reported essential for maintaining cell polarity  
415 (INTU)<sup>84</sup>, proliferation (ANAPC7)<sup>85</sup> and glycemc control (AGBL5)<sup>86</sup>. The brown module  
416 (**Figure 4F**) is enriched with immune response pathways, in which TLR6 is identified as a hub  
417 gene. The other yellow module is related to ion homeostasis, and the gray module is related to  
418 the p53 pathway, apoptosis, cell senescence, and ER stress (**Supplementary Figure 1B**). The  
419 only negatively correlated blue module is associated with axon guidance and VEGF signaling  
420 pathway (**Supplementary Figure 1B**).

421  
422 Furthermore, we examined the PPI network, using the gene-level DNA methylation as surrogates  
423 (**Figure 4G**). The PPI analysis identifies 14 unique pathways (FDR < 0.05) predominantly  
424 associated with hypermethylated CpG sites in the TSS200 and TSS1500 regions. The top five  
425 largest pathways included ribosome, proteasome, cell cycle, axon guidance, RNA polymerase,  
426 and neuroactive ligand-receptor interaction. Taken all three types of systematic analyses  
427 together, cell cycle, immune function and protein synthesis are ubiquitously highlighted,  
428 suggesting that these biological functions in cord blood stem cells are negatively impacted by  
429 maternal obesity.

430

431

### 432 **Multi-omics analysis reveals disruptions in cell cycle and metabolic pathways**

433 To systematically investigate the epigenetic, transcriptomic, and metabolomic alterations  
434 induced by maternal obesity, we performed multi-omics integration analysis on this cohort. We  
435 employed DIABLO, a supervised integration method that extracts features associated with  
436 maternal obesity, based on the correlations in the embedding space<sup>69</sup>. **Figure 5A-C** shows that  
437 methylation data provide the clearest separation between obese and control groups, confirming  
438 the value of the earlier DNA methylation-centered analysis.

439

440 The top 25 features from each omic with the highest feature weights (loadings) following  
441 integrated canonical correlation analysis are demonstrated in **Figure 5D-F**. The methylation  
442 features with the highest weights related to maternal obesity include CpG sites involved in cell-  
443 cycle control, glucose metabolism, and adipogenesis (FOXO1<sup>87</sup>), DNA repair (LIG3, SMUG1),  
444 erythropoietin pathway and differentiation (EPO, CSNK2A1, CSF1), which are hypermethylated  
445 in the obese group. Hypomethylation of LEP (encoding leptin) was also observed as a top  
446 feature, aligning with prior findings that maternal obesity is associated with elevated maternal  
447 leptin levels, a known marker of adipose tissue<sup>88</sup>. These featured CpG sites indicate repression  
448 in fat metabolism and DNA repair and reduced differentiation potential. In the transcriptomic  
449 space, many genes related to mRNA splicing (SRRM1, IGF2BP1, IGF2BP2, CNOT4) have  
450 increased expression levels due to maternal obesity. Among the metabolite features, essential  
451 sugars (glucose, xylose), poly-unsaturated fatty acids (oleic acids, DHA, arachidonic acid), and  
452 phosphatidylcholine (PCs) are mostly decreased in the obese group; whereas most acylcarnitines

453 (C) are elevated. The metabolic changes show an overall accumulation of saturated fatty acid,  
454 but repression of fat breakdown, glucose, and unsaturated fatty acid generation. As poly-  
455 unsaturated fatty acids (eg. arachidonic acid) have important anti-inflammatory effects, the  
456 results indicate a pro-inflammatory environment in offspring born of pre-pregnant obese  
457 mothers.

458

### 459 **CpGs associated with maternal obesity are highly predictive of cancer states**

460 Maternal pre-pregnancy obesity might predispose a higher risk of cancer and other diseases in  
461 babies' later life, via epigenetic modification<sup>12,17</sup>. To check this assumption, we built maternal  
462 obesity classification models using the 186 hypermethylated marker CpG sites obtained from top  
463 KEGG pathways (**Supplementary Table 2**). These 186 CpG markers are from 144 genes  
464 predominantly associated with cell cycle regulation, protein synthesis, and immune function. We  
465 tested different classification methods including GLMNET, KNN, LOG, Random Forest (RF),  
466 SVM methods, and found that the RF model yields the highest accuracy (**Supplementary**  
467 **Figure 4**). We then applied this RF model to the normal adjacency and tumor tissues from DNA  
468 methylation data of 14 TCGA cancers, each having sufficient tumor adjacent normal samples  
469 ( $n > 10$ ). As shown in **Figure 6A**, the averaged random forest AUC reached 0.8687 (0.7417-  
470 0.9966) across all cancer datasets. Similarly, this RF model also yields high values in sensitivity,  
471 specificity, and F-1 scores across cancer types (**Figure 6B**). Thus, the CpGs epigenetic markers  
472 associated with maternal obesity are also strongly associated with tumorigenesis. Our result  
473 supports that maternal pre-pregnancy obesity may predispose offspring to increased cancer risk  
474 later in life through epigenetic modifications.

475

476

## 477 **Discussion**

478 Maternal obesity is one of the most urgent health concerns worldwide. Pre-pregnancy maternal  
479 obesity could cause various pregnancy-related complications and predispose offspring to  
480 cardiometabolic complications and chronic diseases in the long term<sup>9</sup>. Multiple cross-continental  
481 large cohort meta-analyses have shown that maternal obesity is directly associated with  
482 offspring's risk of obesity, coronary heart disease, insulin resistance, and adverse  
483 neurodevelopmental outcomes based on longitudinal observational studies<sup>9,89,90</sup>. To directly  
484 ping-point the molecular level changes in offspring by maternal pre-pregnancy obesity, we used  
485 cord blood stem cells as the studying material, which serve as a great surrogate revealing the  
486 newborn's metabolism and immune system changes at the time of birth<sup>91</sup>. The current study  
487 expands on previous effects and investigates the direct impact of maternal obesity on uHSCs  
488 programming, the progenitor of the immune cell population, using a multi-omics (epigenetic,  
489 gene expression, and metabolite) analysis approach from a unique multi-ethnic cohort.

490

491 Centered around methylation changes, three complimentary functional analysis approaches  
492 (KEGG, WGCNA, and PPI) consistently demonstrated that maternal obesity impacts multiple  
493 biological functions including hypermethylation in promoters of genes involved in cell cycle,  
494 ribosome biogenesis, and mTOR signaling pathways. Moreover, mTOR signaling pathway also  
495 plays a crucial role in metabolism and cell cycle regulation, disruption in this pathway leads to  
496 insulin resistance and long-term diseases<sup>92</sup>. We observed a significant increase in stemness  
497 scores among uHSCs affected by maternal obesity, aligning with expected downregulation in the  
498 cell cycle gene expression due to observed hypermethylation in the promoters of these genes.

499 Higher stemness scores indicate enhanced quiescence, shifting the balance between stem cell  
500 maintenance and differentiation towards the former. Unlike adult HSCs, fetal/neonatal HSCs  
501 typically exhibit higher proliferation and self-renewal capabilities, crucial for blood cell  
502 regeneration and innate immune system development<sup>93</sup>. Our findings provide strong epigenetic  
503 evidence that maternal obesity compromises the maturation processes in neonatal uHSCs, which  
504 may predispose newborns to immunological disorders.

505  
506 The subsequent multi-omics integration analysis expanded conclusions from methylation  
507 analysis to additional metabolomics readouts that are also linked to biological functions eg. cell  
508 cycle and inflammatory pathway. We thus propose the conceptual model to illustrate the effect  
509 of maternal pre-pregnancy obesity (**Figure 7**). Maternal obesity leads to nutrient deficiency with  
510 lower levels of essential amino acids and fatty acids in the newborn blood and disrupts the lipid  
511 metabolism homeostasis in offspring. These metabolite changes further induce cell membrane  
512 instability and repress cell cycle progression, cell proliferation<sup>94</sup>, enhancing the dysregulation of  
513 these functions preexisting at the methylation level. Lipid dysregulation may also enhance the  
514 pro-inflammatory environment, which in turn induces complications in offspring later in life,  
515 such as cardiovascular diseases. Such a proposed model is also consistent with and further  
516 strengthens previous studies at the metabolomics or epigenome levels. For example, previous  
517 metabolomics studies of cord blood showed metabolic derangement predisposes newborns to  
518 cardiometabolic and endocrine diseases, and disrupt the normal hormone function and neonatal  
519 adiposity<sup>88,95</sup>. Previous epigenome-wide association study (EWAS) with cord blood found a  
520 strong association between DNA methylation pattern and postnatal BMI trajectory until  
521 adolescent<sup>96</sup>.

522

523 Perhaps another most significant finding of this study is that it provides direct and strong  
524 quantitative support to the long-speculated theory of the utero origin of cancers<sup>10,11</sup>. In particular,  
525 some researchers hypothesized there exist higher stem cell burdens in newborn babies born from  
526 obese mothers<sup>12</sup>. Here we provide direct evidence that such stem cell burden is highly likely due  
527 to transgenerational DNA methylation modification on some key biological functions (cell cycle,  
528 ribosome function, and immune response) in the uHSCs. We demonstrated this by applying a  
529 random forest model using the 186 maternal obesity-associated CpG markers in uHSCs on 14  
530 cancer types across thousands of samples in TCGA. The random forest model achieved high  
531 classification accuracy in distinguishing between tumor and adjacent normal tissues.

532 Uncontrolled cell division, immune evasion, and chronic inflammation are well-established  
533 hallmarks of cancer<sup>97</sup>, and these featured 186 CpG sites were implicated in relevant biological  
534 pathways that were intimately connected with cancer development. Aforehand results revealed a  
535 significant increase in stemness scores among uHSCs affected by maternal obesity, which aligns  
536 with the observed hypermethylation and subsequent downregulation of key cell cycle genes. This  
537 heightened stemness may predispose these cells to malignant transformation if these epigenetic  
538 modifications persist, leading to an elevated stem cell burden, disrupting normal cell cycle  
539 control, weakening immune surveillance, and ultimately increasing susceptibility to cancer.

540

541 In summary, this newborn study demonstrates the direct impact of maternal pre-pregnancy  
542 obesity and on newborn blood at the multi-omics level, which includes increased cell cycle  
543 arrest, impairment in the uHSCs differentiation capacity, more inflammation, and disruption in  
544 lipid metabolism. We also showed maternal obesity-associated epigenetic modifications are



545 closely related to cancer markers, which could potentially help mitigate the transgenerational  
546 health risks.

547

548

#### 549 **Declaration of generative AI and AI-assisted technologies in the writing process**

550 During the preparation of this work the author(s) used GPT-4.0 in order to improve the  
551 readability. After using this tool/service, the author(s) reviewed and edited the content  
552 thoroughly and take(s) full responsibility for the content of the publication.

553

#### 554 **Data availability statement**

555 Data generated in this study have been submitted and will be available through the National  
556 Institutes of Health Gene Expression Omnibus (GEO reviewer token available upon request).  
557 Code to produce the analyses in this manuscript are available through GitHub  
558 (<https://github.com/lanagarmire/>)

559

#### 560 **Acknowledgments**

561 This research was supported by grants R01 LM012373 and LM012907 awarded by NLM, and  
562 R01 HD084633 awarded by NICHD to L.X. Garmire, as well as in part by the NCI Cancer  
563 Center Support Grant (CCSG) number P30 CA071789 awarded to Genomics and Bioinformatics  
564 Shared Resource (RRID:SCR\_019085). This research was supported in part by training funding  
565 provided by the NIH grant T32 GM141746 and Advanced Proteogenomics of Cancer (T32  
566 CA140044).

567

568 **Author contributions**

569 LG envisioned this project, obtained the funding, supervised the study and revised the  
570 manuscript. YD performed the data analysis, generated the figures, and wrote the initial  
571 manuscript. YS collected TCGA data and built the machine learning models. RS consented  
572 patients and obtained the samples from the hospital, with coordination from PB. DT and SW  
573 coordinated with the patient recruitment and study. PB coordinated all the multi-omics assays.  
574 PB, CL, and FA designed the DNA methylation assays. AG performed FACS sorting of cord  
575 blood cells. ALJ performed the Illumina Meth 450 assay, MT supervised the Genomics Shared  
576 Resource analyses and provided a critical review of the manuscript. All authors have read the  
577 manuscript.

578

579 **Conflicts of interest**

580 None

581

582

583 **References**

- 584 1. Leddy, M.A., Power, M.L., and Schulkin, J. (2008). The impact of maternal obesity on  
585 maternal and fetal health. *Rev. Obstet. Gynecol. 1*, 170–178.
- 586 2. Hjalgrim, L.L., Westergaard, T., Rostgaard, K., Schmiegelow, K., Melbye, M., Hjalgrim,  
587 H., and Engels, E.A. (2003). Birth weight as a risk factor for childhood leukemia: a meta-  
588 analysis of 18 epidemiologic studies. *Am. J. Epidemiol. 158*, 724–735.
- 589 3. Harder, T., Plagemann, A., and Harder, A. (2010). Birth weight and risk of neuroblastoma:  
590 a meta-analysis. *Int. J. Epidemiol. 39*, 746–756.
- 591 4. Cnattingius, S., Lundberg, F., Sandin, S., Grönberg, H., and Iliadou, A. (2009). Birth  
592 characteristics and risk of prostate cancer: the contribution of genetic factors. *Cancer*  
593 *Epidemiol. Biomarkers Prev. 18*, 2422–2426.

- 594 5. Eriksson, M., Wedel, H., Wallander, M.-A., Krakau, I., Hugosson, J., Carlsson, S., and  
595 Svärdsudd, K. (2007). The impact of birth weight on prostate cancer incidence and  
596 mortality in a population-based study of men born in 1913 and followed up from 50 to 85  
597 years of age. *Prostate* 67, 1247–1254.
- 598 6. Michos, A., Xue, F., and Michels, K.B. (2007). Birth weight and the risk of testicular  
599 cancer: a meta-analysis. *Int. J. Cancer* 121, 1123–1131.
- 600 7. Silva, I. dos S., De Stavola, B., McCormack, V., and Collaborative Group on Pre-Natal Risk  
601 Factors and Subsequent Risk of Breast Cancer (2008). Birth size and breast cancer risk: re-  
602 analysis of individual participant data from 32 studies. *PLoS Med.* 5, e193.
- 603 8. Van Cleave, J., Gortmaker, S.L., and Perrin, J.M. (2010). Dynamics of obesity and chronic  
604 health conditions among children and youth. *JAMA* 303, 623–630.
- 605 9. Godfrey, K.M., Reynolds, R.M., Prescott, S.L., Nyirenda, M., Jaddoe, V.W., Eriksson, J.G.,  
606 and Broekman, B.F. (2017). Influence of maternal obesity on the long-term health of  
607 offspring. *The lancet. Diabetes & endocrinology* 5. [https://doi.org/10.1016/S2213-](https://doi.org/10.1016/S2213-8587(16)30107-3)  
608 [8587\(16\)30107-3](https://doi.org/10.1016/S2213-8587(16)30107-3).
- 609 10. Barker, D.J. (2007). The origins of the developmental origins theory. *J. Intern. Med.* 261.  
610 <https://doi.org/10.1111/j.1365-2796.2007.01809.x>.
- 611 11. Barker, D.J. (2000). In utero programming of cardiovascular disease. *Theriogenology* 53.  
612 [https://doi.org/10.1016/s0093-691x\(99\)00258-7](https://doi.org/10.1016/s0093-691x(99)00258-7).
- 613 12. Qiu, L., Low, H.P., Chang, C.-I., Strohsnitter, W.C., Anderson, M., Edmiston, K., Adami,  
614 H.-O., Ekblom, A., Hall, P., Ligiou, P., et al. (2012). Novel measurements of mammary  
615 stem cells in human umbilical cord blood as prospective predictors of breast cancer  
616 susceptibility in later life. *Ann. Oncol.* 23, 245–250.
- 617 13. Savarese, T.M., Strohsnitter, W.C., Low, H.P., Liu, Q., Baik, I., Okulicz, W., Chelmos,  
618 D.P., Ligiou, P., Quesenberry, P.J., Noller, K.L., et al. (2007). Correlation of umbilical cord  
619 blood hormones and growth factors with stem cell potential: implications for the prenatal  
620 origin of breast cancer hypothesis. *Breast Cancer Res.* 9, R29.
- 621 14. Marshall, G.M., Carter, D.R., Cheung, B.B., Liu, T., Mateos, M.K., Meyerowitz, J.G., and  
622 Weiss, W.A. (2014). The prenatal origins of cancer. *Nat. Rev. Cancer* 14, 277–289.
- 623 15. Fábíán, Á., Vereb, G., and Szöllösi, J. (2013). The hitchhikers guide to cancer stem cell  
624 theory: markers, pathways and therapy. *Cytometry A* 83, 62–71.
- 625 16. Tan, B.T., Park, C.Y., Ailles, L.E., and Weissman, I.L. (2006). The cancer stem cell  
626 hypothesis: a work in progress. *Lab. Invest.* 86, 1203–1207.
- 627 17. Strohsnitter, W.C., Savarese, T.M., Low, H.P., Chelmos, D.P., Ligiou, P., Lambe, M.,  
628 Edmiston, K., Liu, Q., Baik, I., Noller, K.L., et al. (2008). Correlation of umbilical cord  
629 blood haematopoietic stem and progenitor cell levels with birth weight: implications for a

- 630 prenatal influence on cancer risk. *Br. J. Cancer* 98, 660–663.
- 631 18. Apgar, V. (1953). A Proposal for a New Method of Evaluation of the Newborn Infant.  
632 *Anesthesia & Analgesia* 32, 260.
- 633 19. Morris, T.J., Butcher, L.M., Feber, A., Teschendorff, A.E., Chakravarthy, A.R., Wojdacz,  
634 T.K., and Beck, S. (2014). ChAMP: 450k Chip Analysis Methylation Pipeline.  
635 *Bioinformatics* 30, 428–430.
- 636 20. Aryee, M.J., Jaffe, A.E., Corrada-Bravo, H., Ladd-Acosta, C., Feinberg, A.P., Hansen,  
637 K.D., and Irizarry, R.A. (2014). Minfi: a flexible and comprehensive Bioconductor package  
638 for the analysis of Infinium DNA methylation microarrays. *Bioinformatics* 30, 1363–1369.
- 639 21. Fortin, J.-P., Triche, T.J., Jr, and Hansen, K.D. (2017). Preprocessing, normalization and  
640 integration of the Illumina HumanMethylationEPIC array with minfi. *Bioinformatics* 33,  
641 558–560.
- 642 22. Zhou, W., Laird, P.W., and Shen, H. (2017). Comprehensive characterization, annotation  
643 and innovative use of Infinium DNA methylation BeadChip probes. *Nucleic Acids Res.* 45,  
644 e22.
- 645 23. Teschendorff, A.E., Marabita, F., Lechner, M., Bartlett, T., Tegner, J., Gomez-Cabrero, D.,  
646 and Beck, S. (2013). A beta-mixture quantile normalization method for correcting probe  
647 design bias in Illumina Infinium 450 k DNA methylation data. *Bioinformatics* 29, 189–196.
- 648 24. Du, P., Kibbe, W.A., and Lin, S.M. (2007). nuID: a universal naming scheme of  
649 oligonucleotides for illumina, affymetrix, and other microarrays. *Biol. Direct* 2, 16.
- 650 25. Lin, S.M., Du, P., Huber, W., and Kibbe, W.A. (2008). Model-based variance-stabilizing  
651 transformation for Illumina microarray data. *Nucleic Acids Res.* 36, e11.
- 652 26. Du, P., Kibbe, W.A., and Lin, S.M. (2008). lumi: a pipeline for processing Illumina  
653 microarray. *Bioinformatics* 24, 1547–1548.
- 654 27. Du, P., Zhang, X., Huang, C.-C., Jafari, N., Kibbe, W.A., Hou, L., and Lin, S.M. (2010).  
655 Comparison of Beta-value and M-value methods for quantifying methylation levels by  
656 microarray analysis. *BMC Bioinformatics* 11, 587.
- 657 28. He, B., Liu, Y., Maurya, M.R., Benny, P., Lassiter, C., Li, H., Subramaniam, S., and  
658 Garmire, L.X. (2021). The maternal blood lipidome is indicative of the pathogenesis of  
659 severe preeclampsia. *J. Lipid Res.* 62. <https://doi.org/10.1016/j.jlr.2021.100118>.
- 660 29. Chen, Y., He, B., Liu, Y., Aung, M.T., Rosario-Pabón, Z., Vélez-Vega, C.M.,  
661 Alshawabkeh, A., Cordero, J.F., Meeker, J.D., and Garmire, L.X. (2022). Maternal plasma  
662 lipids are involved in the pathogenesis of preterm birth. *Gigascience* 11.  
663 <https://doi.org/10.1093/gigascience/giac004>.
- 664 30. Ritchie, M.E., Phipson, B., Wu, D., Hu, Y., Law, C.W., Shi, W., and Smyth, G.K. (2015).

- 665 limma powers differential expression analyses for RNA-sequencing and microarray studies.  
666 *Nucleic Acids Res.* *43*, e47.
- 667 31. Jaffe, A.E., Murakami, P., Lee, H., Leek, J.T., Fallin, M.D., Feinberg, A.P., and Irizarry,  
668 R.A. (2012). Bump hunting to identify differentially methylated regions in epigenetic  
669 epidemiology studies. *Int. J. Epidemiol.* *41*, 200–209.
- 670 32. Novakovic, B., Yuen, R.K., Gordon, L., Penaherrera, M.S., Sharkey, A., Moffett, A., Craig,  
671 J.M., Robinson, W.P., and Saffery, R. (2011). Evidence for widespread changes in promoter  
672 methylation profile in human placenta in response to increasing gestational age and  
673 environmental/stochastic factors. *BMC Genomics* *12*. [https://doi.org/10.1186/1471-2164-](https://doi.org/10.1186/1471-2164-12-529)  
674 [12-529](https://doi.org/10.1186/1471-2164-12-529).
- 675 33. GEO Accession viewer <https://www.ncbi.nlm.nih.gov/geo/query/acc.cgi?acc=GSE36829>.
- 676 34. Chu, T., Bunce, K., Shaw, P., Shridhar, V., Althouse, A., Hubel, C., and Peters, D. (2014).  
677 Comprehensive analysis of preeclampsia-associated DNA methylation in the placenta.  
678 *PLoS One* *9*. <https://doi.org/10.1371/journal.pone.0107318>.
- 679 35. Blair, J.D., Yuen, R.K., Lim, B.K., McFadden, D.E., von Dadelszen, P., and Robinson,  
680 W.P. (2013). Widespread DNA hypomethylation at gene enhancer regions in placentas  
681 associated with early-onset pre-eclampsia. *Mol. Hum. Reprod.* *19*.  
682 <https://doi.org/10.1093/molehr/gat044>.
- 683 36. Hanna, C.W., Peñaherrera, M.S., Saadeh, H., Andrews, S., McFadden, D.E., Kelsey, G.,  
684 and Robinson, W.P. (2016). Pervasive polymorphic imprinted methylation in the human  
685 placenta. *Genome Res.* *26*. <https://doi.org/10.1101/gr.196139.115>.
- 686 37. Blair, J.D., Langlois, S., McFadden, D.E., and Robinson, W.P. (2014). Overlapping DNA  
687 methylation profile between placentas with trisomy 16 and early-onset preeclampsia.  
688 *Placenta* *35*. <https://doi.org/10.1016/j.placenta.2014.01.001>.
- 689 38. Price, E.M., Peñaherrera, M.S., Portales-Casamar, E., Pavlidis, P., Van Allen, M.I.,  
690 McFadden, D.E., and Robinson, W.P. (2016). Profiling placental and fetal DNA  
691 methylation in human neural tube defects. *Epigenetics Chromatin* *9*.  
692 <https://doi.org/10.1186/s13072-016-0054-8>.
- 693 39. Leavey, K., Wilson, S.L., Bainbridge, S.A., Robinson, W.P., and Cox, B.J. (2018).  
694 Epigenetic regulation of placental gene expression in transcriptional subtypes of  
695 preeclampsia. *Clin. Epigenetics* *10*. <https://doi.org/10.1186/s13148-018-0463-6>.
- 696 40. Wilson, S.L., Leavey, K., Cox, B.J., and Robinson, W.P. (2018). Mining DNA methylation  
697 alterations towards a classification of placental pathologies. *Hum. Mol. Genet.* *27*.  
698 <https://doi.org/10.1093/hmg/ddx391>.
- 699 41. Hansen, K.D. IlluminaHumanMethylation450kanno. ilmn12. hg19: annotation for  
700 Illumina's 450k methylation arrays. R package version 0.6. 0.

- 701 42. Maksimovic, J., Gordon, L., and Oshlack, A. (2012). SWAN: Subset-quantile within array  
702 normalization for illumina infinium HumanMethylation450 BeadChips. *Genome Biol.* *13*,  
703 R44.
- 704 43. Phipson, B., and Oshlack, A. (2014). DiffVar: a new method for detecting differential  
705 variability with application to methylation in cancer and aging. *Genome Biol.* *15*, 465.
- 706 44. Maksimovic, J., Gagnon-Bartsch, J.A., Speed, T.P., and Oshlack, A. (2015). Removing  
707 unwanted variation in a differential methylation analysis of Illumina HumanMethylation450  
708 array data. *Nucleic Acids Res.* *43*, e106.
- 709 45. Phipson, B., Maksimovic, J., and Oshlack, A. (2016). missMethyl: an R package for  
710 analyzing data from Illumina's HumanMethylation450 platform. *Bioinformatics* *32*, 286–  
711 288.
- 712 46. Kanehisa, M., and Goto, S. (2000). KEGG: kyoto encyclopedia of genes and genomes.  
713 *Nucleic Acids Res.* *28*, 27–30.
- 714 47. Kanehisa, M. (2019). Toward understanding the origin and evolution of cellular organisms.  
715 *Protein Sci.* *28*, 1947–1951.
- 716 48. Kanehisa, M., Furumichi, M., Sato, Y., Kawashima, M., and Ishiguro-Watanabe, M. (2022).  
717 KEGG for taxonomy-based analysis of pathways and genomes. *Nucleic Acids Res.*  
718 <https://doi.org/10.1093/nar/gkac963>.
- 719 49. Langfelder, P., and Horvath, S. (2008). WGCNA: an R package for weighted correlation  
720 network analysis. *BMC Bioinformatics* *9*, 559.
- 721 50. Langfelder, P., and Horvath, S. (2012). Fast R Functions for Robust Correlations and  
722 Hierarchical Clustering. *J. Stat. Softw.* *46*. <https://doi.org/10.18637/jss.v046.i11>.
- 723 51. Szklarczyk, D., Gable, A.L., Nastou, K.C., Lyon, D., Kirsch, R., Pyysalo, S., Doncheva,  
724 N.T., Legeay, M., Fang, T., Bork, P., et al. (2021). The STRING database in 2021:  
725 customizable protein-protein networks, and functional characterization of user-uploaded  
726 gene/measurement sets. *Nucleic Acids Res.* *49*, D605–D612.
- 727 52. Li, H., Tong, P., Gallegos, J., Dimmer, E., Cai, G., Molldrem, J.J., and Liang, S. (2015).  
728 PAND: A Distribution to Identify Functional Linkage from Networks with Preferential  
729 Attachment Property. *PLoS One* *10*, e0127968.
- 730 53. Shannon, P., Markiel, A., Ozier, O., Baliga, N.S., Wang, J.T., Ramage, D., Amin, N.,  
731 Schwikowski, B., and Ideker, T. (2003). Cytoscape: a software environment for integrated  
732 models of biomolecular interaction networks. *Genome Res.* *13*, 2498–2504.
- 733 54. He, B., and Garmire, L.X. (2021). ASGARD: A Single-cell Guided pipeline to Aid  
734 Repurposing of Drugs. *ArXiv*.
- 735 55. MacArthur, B.D., and Lemischka, I.R. (2013). Statistical mechanics of pluripotency. *Cell*



- 736 154, 484–489.
- 737 56. Martínez, O., and Reyes-Valdés, M.H. (2008). Defining diversity, specialization, and gene  
738 specificity in transcriptomes through information theory. *Proc. Natl. Acad. Sci. U. S. A.*  
739 *105*, 9709–9714.
- 740 57. Kannan, S., Farid, M., Lin, B.L., Miyamoto, M., and Kwon, C. (2021). Transcriptomic  
741 entropy benchmarks stem cell-derived cardiomyocyte maturation against endogenous tissue  
742 at single cell level. *PLoS Comput. Biol.* *17*, e1009305.
- 743 58. Bushnell, B. (2014). BBMap: A Fast, Accurate, Splice-Aware Aligner.
- 744 59. Andrews, S. FastQC: a quality control tool for high throughput sequence data. Available  
745 online. Retrieved May.
- 746 60. Dobin, A., Davis, C.A., Schlesinger, F., Drenkow, J., Zaleski, C., Jha, S., Batut, P.,  
747 Chaisson, M., and Gingeras, T.R. (2013). STAR: ultrafast universal RNA-seq aligner.  
748 *Bioinformatics* *29*, 15–21.
- 749 61. Liao, Y., Smyth, G.K., and Shi, W. (2014). featureCounts: an efficient general purpose  
750 program for assigning sequence reads to genomic features. *Bioinformatics* *30*, 923–930.
- 751 62. Liao, Y., Smyth, G.K., and Shi, W. (2013). The Subread aligner: fast, accurate and scalable  
752 read mapping by seed-and-vote. *Nucleic Acids Res.* *41*, e108.
- 753 63. Love, M.I., Huber, W., and Anders, S. (2014). Moderated estimation of fold change and  
754 dispersion for RNA-seq data with DESeq2. *Genome Biol.* *15*, 550.
- 755 64. Chen, J., Xu, H., Aronow, B.J., and Jegga, A.G. (2007). Improved human disease candidate  
756 gene prioritization using mouse phenotype. *BMC Bioinformatics* *8*, 392.
- 757 65. Chen, J., Aronow, B.J., and Jegga, A.G. (2009). Disease candidate gene identification and  
758 prioritization using protein interaction networks. *BMC Bioinformatics* *10*, 73.
- 759 66. Chen, J., Bardes, E.E., Aronow, B.J., and Jegga, A.G. (2009). ToppGene Suite for gene list  
760 enrichment analysis and candidate gene prioritization. *Nucleic Acids Res.* *37*, W305–W311.
- 761 67. Schlueter, R.J., Al-Akwaa, F.M., Benny, P.A., Gurary, A., Xie, G., Jia, W., Chun, S.J.,  
762 Chern, I., and Garmire, L.X. (2020). Pregnant Obesity of Mothers in a Multiethnic  
763 Cohort Is Associated with Cord Blood Metabolomic Changes in Offspring. *J. Proteome*  
764 *Res.* *19*, 1361–1374.
- 765 68. Johnson, W.E., Li, C., and Rabinovic, A. (2006). Adjusting batch effects in microarray  
766 expression data using empirical Bayes methods. *Biostatistics* *8*, 118–127.
- 767 69. Singh, A., Shannon, C.P., Gautier, B., Rohart, F., Vacher, M., Tebbutt, S.J., and Cao, K.-  
768 A.L. (2019). DIABLO: an integrative approach for identifying key molecular drivers from  
769 multi-omics assays. *Bioinformatics* *35*, 3055.

- 770 70. Luo, W., and Brouwer, C. (2013). Pathview: an R/Bioconductor package for pathway-based  
771 data integration and visualization. *Bioinformatics* 29, 1830–1831.
- 772 71. Kuhn, M. (2008). Building Predictive Models in R Using the caret Package. *J. Stat. Softw.*  
773 28, 1–26.
- 774 72. Fang, X., Liu, Y., Ren, Z., Du, Y., Huang, Q., and Garmire, L.X. (2021). Lilikoi V2.0: a  
775 deep learning-enabled, personalized pathway-based R package for diagnosis and prognosis  
776 predictions using metabolomics data. *Gigascience* 10.  
777 <https://doi.org/10.1093/gigascience/giaa162>.
- 778 73. Heard, E., and Martienssen, R.A. (2014). Transgenerational epigenetic inheritance: myths  
779 and mechanisms. *Cell* 157, 95–109.
- 780 74. King, S.E., and Skinner, M.K. (2020). Epigenetic Transgenerational Inheritance of Obesity  
781 Susceptibility. *Trends Endocrinol. Metab.* 31, 478–494.
- 782 75. Morisako, A.K., Tauali‘i, M., Ambrose, A.J.H., and Withy, K. (2017). Beyond the Ability  
783 to Pay: The Health Status of Native Hawaiians and Other Pacific Islanders in Relationship  
784 to Health Insurance. *Hawaii J. Med. Public Health* 76, 36.
- 785 76. Heslehurst, N., Vieira, R., Akhter, Z., Bailey, H., Slack, E., Ngongalah, L., Pemu, A., and  
786 Rankin, J. (2019). The association between maternal body mass index and child obesity: A  
787 systematic review and meta-analysis. *PLoS Med.* 16, e1002817.
- 788 77. Liu, W., Yang, X., Mao, Z., Du, Y., Lassiter, C., AlAkwa, F.M., Benny, P.A., and  
789 Garmire, L.X. Severe preeclampsia is not associated with significant DNA methylation  
790 changes but cell proportion changes in the cord blood - caution on the importance of  
791 confounding adjustment. medRxiv. <https://doi.org/10.1101/2023.08.31.23294898>.
- 792 78. Abu-Farha, M., Tiss, A., Abubaker, J., Khadir, A., Al-Ghimlas, F., Al-Khairi, I., Baturcam,  
793 E., Cherian, P., Elkum, N., Hammad, M., et al. (2013). Proteomics Analysis of Human  
794 Obesity Reveals the Epigenetic Factor HDAC4 as a Potential Target for Obesity. *PLoS One*  
795 8. <https://doi.org/10.1371/journal.pone.0075342>.
- 796 79. Rönn, T., Volkov, P., Gillberg, L., Kokosar, M., Perfilyev, A., Jacobsen, A.L., Jørgensen,  
797 S.W., Brøns, C., Jansson, P.A., Eriksson, K.F., et al. (2015). Impact of age, BMI and  
798 HbA1c levels on the genome-wide DNA methylation and mRNA expression patterns in  
799 human adipose tissue and identification of epigenetic biomarkers in blood. *Hum. Mol.*  
800 *Genet.* 24. <https://doi.org/10.1093/hmg/ddv124>.
- 801 80. Lim, W.-J., Kim, K.H., Kim, J.-Y., Jeong, S., and Kim, N. (2019). Identification of DNA-  
802 Methylated CpG Islands Associated With Gene Silencing in the Adult Body Tissues of the  
803 Ogye Chicken Using RNA-Seq and Reduced Representation Bisulfite Sequencing. *Front.*  
804 *Genet.* 10, 346.
- 805 81. Ching, T., Song, M.-A., Tiirikainen, M., Molnar, J., Berry, M., Towner, D., and Garmire,  
806 L.X. (2014). Genome-wide hypermethylation coupled with promoter hypomethylation in



- 807 the chorioamniotic membranes of early onset pre-eclampsia. *Mol. Hum. Reprod.* *20*, 885–  
808 904.
- 809 82. Meng, D., Frank, A.R., and Jewell, J.L. (2018). mTOR signaling in stem and progenitor  
810 cells. *Development* *145*. <https://doi.org/10.1242/dev.152595>.
- 811 83. Guo, M., Bao, E.L., Wagner, M., Whitsett, J.A., and Xu, Y. (2017). SLICE: determining  
812 cell differentiation and lineage based on single cell entropy. *Nucleic Acids Res.* *45*, e54.
- 813 84. Dai, D., Li, L., Huebner, A., Zeng, H., Guevara, E., Claypool, D.J., Liu, A., and Chen, J.  
814 (2012). Planar cell polarity effector gene *Intu* regulates cell fate-specific differentiation of  
815 keratinocytes through the primary cilia. *Cell Death Differ.* *20*, 130–138.
- 816 85. Liu, J., and Fuchs, S.Y. (2006). Cross-talk between APC/C and CBP/p300. *Cancer Biol.*  
817 *Ther.* *5*. <https://doi.org/10.4161/cbt.5.7.3103>.
- 818 86. Corbi, S.C.T., Bastos, A.S., Nepomuceno, R., Cirelli, T., Dos Santos, R.A., Takahashi, C.S.,  
819 Rocha, C.S., Orrico, S.R.P., Maurer-Morelli, C.V., and Scarel-Caminaga, R.M. (2017).  
820 Expression Profile of Genes Potentially Associated with Adequate Glycemic Control in  
821 Patients with Type 2 Diabetes Mellitus. *Journal of diabetes research* *2017*.  
822 <https://doi.org/10.1155/2017/2180819>.
- 823 87. Behl, T., Kaur, I., Sehgal, A., Singh, S., Zengin, G., Negrut, N., Nistor-Cseppento, D.C.,  
824 Pavel, F.M., Aron, R.A.C., and Bungau, S. (2021). Exploring the Genetic Conception of  
825 Obesity via the Dual Role of FoxO. *Int. J. Mol. Sci.* *22*.  
826 <https://doi.org/10.3390/ijms22063179>.
- 827 88. Kadakia, R., Zheng, Y., Zhang, Z., Zhang, W., Hou, L., and Josefson, J.L. (2017). Maternal  
828 pre-pregnancy BMI downregulates neonatal cord blood LEP methylation. *Pediatr. Obes.* *12*  
829 *Suppl 1*, 57–64.
- 830 89. Yu, Z., Han, S., Zhu, J., Sun, X., Ji, C., and Guo, X. (2013). Pre-pregnancy body mass  
831 index in relation to infant birth weight and offspring overweight/obesity: a systematic  
832 review and meta-analysis. *PLoS One* *8*, e61627.
- 833 90. Sureshchandra, S., Marshall, N.E., and Messaoudi, I. (2019). Impact of pregravid obesity on  
834 maternal and fetal immunity: Fertile grounds for reprogramming. *J. Leukoc. Biol.* *106*,  
835 1035–1050.
- 836 91. Levy, O. (2005). Innate immunity of the human newborn: distinct cytokine responses to  
837 LPS and other Toll-like receptor agonists. *J. Endotoxin Res.* *11*, 113–116.
- 838 92. Ong, P.S., Wang, L.Z., Dai, X., Tseng, S.H., Loo, S.J., and Sethi, G. (2016). Judicious  
839 Toggling of mTOR Activity to Combat Insulin Resistance and Cancer: Current Evidence  
840 and Perspectives. *Front. Pharmacol.* *7*. <https://doi.org/10.3389/fphar.2016.00395>.
- 841 93. Mack, R., Zhang, L., Breslin, P., and Zhang, J. (2021). The fetal-to-adult hematopoietic  
842 stem cell transition and its role in childhood hematopoietic malignancies. *Stem cell reviews*

- 843 and reports *17*, 2059.
- 844 94. Kwok, A.C., and Wong, J.T. (2005). Lipid biosynthesis and its coordination with cell cycle  
845 progression. *Plant Cell Physiol.* *46*. <https://doi.org/10.1093/pcp/pci213>.
- 846 95. Denizli, M., Capitano, M.L., and Kua, K.L. (2022). Maternal obesity and the impact of  
847 associated early-life inflammation on long-term health of offspring. *Front. Cell. Infect.*  
848 *Microbiol.* *12*, 940937.
- 849 96. Meir, A.Y., Huang, W., Cao, T., Hong, X., Wang, G., Pearson, C., Adams, W.G., Wang, X.,  
850 and Liang, L. (2023). Umbilical cord DNA methylation is associated with body mass index  
851 trajectories from birth to adolescence. *EBioMedicine* *91*, 104550.
- 852 97. Hanahan, D., and Weinberg, R.A. (2011). Hallmarks of Cancer: The Next Generation. *Cell*  
853 *144*, 646–674.
- 854 98. O’Flaherty, J.D., Barr, M., Fennell, D., Richard, D., Reynolds, J., O’Leary, J., and O’Byrne,  
855 K. (2012). The cancer stem-cell hypothesis: its emerging role in lung cancer biology and its  
856 relevance for future therapy. *J. Thorac. Oncol.* *7*, 1880–1890.
- 857 99. Oesterreich, S., Allredl, D.C., Mohsin, S.K., Zhang, Q., Wong, H., Lee, A.V., Osborne,  
858 C.K., and O’Connell, P. (2001). High rates of loss of heterozygosity on chromosome 19p13  
859 in human breast cancer. *Br. J. Cancer* *84*, 493–498.
- 860 100. Hong, E.A., Gautrey, H.L., Elliott, D.J., and Tyson-Capper, A.J. (2012). SAFB1- and  
861 SAFB2-mediated transcriptional repression: relevance to cancer. *Biochem. Soc. Trans.* *40*,  
862 826–830.
- 863 101. Hammerich-Hille, S., Kaiparettu, B.A., Tsimelzon, A., Creighton, C.J., Jiang, S., Polo,  
864 J.M., Melnick, A., Meyer, R., and Oesterreich, S. (2010). SAFB1 mediates repression of  
865 immune regulators and apoptotic genes in breast cancer cells. *J. Biol. Chem.* *285*, 3608–  
866 3616.
- 867
- 868

869 **Figure legends**

870

871 **Figure 1. Overview of the study design and analysis.** In the preparation step, cord blood  
872 plasma samples are collected for metabolome profiling and stem cell sorting. DNA and RNA  
873 extraction assays are performed on the enriched stem cells for the methylation and RNA-seq  
874 analyses. Downstream analyses are mainly focused on the methylation data. Bulk RNA-seq data  
875 were used for validations for methylation discoveries. (Created with BioRender.com)

876

877 **Figure 2. Mother and newborns statistics of the multi-ethnic cohort from Hawaii. (A-E)**  
878 Categorical variables including baby sex, maternal ethnicity, paternal ethnicity, parity and  
879 gravidity between control and obese groups are shown in the barplots. P-values using Chi-square  
880 test are annotated comparing control and obese groups. **(F-I)** The distributions of maternal age,  
881 gestation age, maternal net weight gain during pregnancy, and maternal hemoglobin between  
882 control and obese groups are compared. Mean and standard deviation are shown in boxplot. P-  
883 values using t-test are annotated. **(J-M)** The distributions of baby weight, baby head  
884 circumference, baby length, and APGAR score after 5 minutes of delivery between control and  
885 obese groups are compared. Mean and standard deviation are shown in boxplot. P-values using t-  
886 test are annotated.

887

888 **Figure 3. DNA methylation analysis on uHSCs.**

889 **(A-B)** Source of variance plot before and after confounding adjustment. F-statistics are reported  
890 for each clinical factor. F statistics greater than 1 are considered to have confounding effects in  
891 addition to the case/control difference due to pre-pregnancy maternal obesity. **(C)** Volcano plot

892 of  $-\log(\text{BH adjusted p-values})$  against  $\log\text{FC}$ . The cutoff line for adjusted p-value  $< 0.05$  is  
893 shown as the red horizontal line. The hyper/hypo threshold is shown as a blue vertical line where  
894  $\log\text{FC}=0$ . Non-significant methylation CpG sites after the differential analysis were shown in  
895 gray. Significant CpG sites are colored. After the removal of gestational age-related CpG sites,  
896 10,254 CpG sites are hypermethylated and 5,394 sites are hypomethylated. **(D-E)** Normalized  
897 location distribution of differentially methylated CpG sites according to their CpG features in  
898 terms of isle regions and gene regions based on the chip annotation. Isle regions include shelf,  
899 shore, island, and open-sea. Gene regions include gene body, intergenic region (IGR), TSS200,  
900 TSS1500, 5'UTR, 3'UTR, and 1st Exon.

901

902 **Figure 4. Pathway and network analysis.** **(A)** KEGG pathway enrichment for  
903 hypermethylated CpG sites from promotor region. Enriched KEGG pathway names, adjusted p-  
904 values ( $-\log_{10}$  transformed), and the size of enriched gene list are reported for CpG sites from  
905 TSS200+TSS1500 regions. The red dotted line shows the threshold cutoff for FDR at -  
906  $\log_{10}(0.05)$ . **(B-C)** Violin plots of averaged beta values for KEGG protein pathway collection  
907 and immune pathway collection with Wilcoxon P-values. **(D)** Violin plots of cell entropy scores  
908 between control and obese groups with Wilcoxon P-values. **(E-F)** WGCNA network analysis  
909 results. WGCNA modules are shown for both the control and the obese group. The top two  
910 modules with largest degrees are turquoise and brown modules. Each node represents a gene.  
911 Genes co-expressed in each module are annotated. **(G)** Protein-protein interaction (PPI) network.  
912 Bipartite graphs represent enriched KEGG pathways and associated genes with significant PPIs.  
913 Red nodes represent genes with hypermethylated CpG sites. Blue nodes represent genes with  
914 hypomethylated CpG sites. Yellow nodes represented the enriched KEGG pathways. Number of

915 inter-pathway PPIs are annotated in the rectangular boxes.

916

917 **Figure 5. Multi-omics integration analysis**

918 (A-C) Omics-specific sample plots from DIABLO showing the separation of obese and control

919 samples in methylation data, gene expression data, and metabolomics data respectively. (D-F)

920 Importance plot of top 25 features in methylation, gene expression and metabolomics modalities

921 with the highest loadings extracted from the embedding space. The color represents the condition

922 which features contribute the most.

923

924 **Figure 6. TCGA cancer classification model with maternal obesity markers**

925 (A) Receiver operating characteristic (ROC) curves of 14 TCGA random forest models built

926 with maternal pre-pregnancy obesity associated CpG markers on testing datasets. Area under the

927 curve (AUC) scores are annotated for each cancer type. (B) Random forest classification models

928 performances (AUC, Sensitivity, Specificity, and F1) on testing datasets. Mean and standard

929 deviation of the evaluation metrics are calculated over iterations.

930

931

932 **Figure 7. A proposed model of maternal obesity's impact on neonatal development.**

933

934

935

936

937

938 **Tables**

939 **Table 1. Summary statistics of the study cohort.**

|                    |           | Control (n=38) | Case (n=34) |
|--------------------|-----------|----------------|-------------|
| Maternal Age       |           | 31.3±5.6       | 31.6±4.9    |
| Gestational Week   |           | 38.9±0.5       | 39.0±0.3    |
| Net Weight Gain    |           | 32.0±11.6      | 30.9±14.6   |
| Hemoglobin         |           | 11.6±1.6       | 11.0±1.4    |
| Maternal Ethnicity | Asian     | 21             | 8           |
|                    | Caucasian | 11             | 4           |
|                    | NHPI      | 6              | 22          |
| Paternal Ethnicity | Asian     | 19             | 11          |
|                    | Caucasian | 11             | 2           |
|                    | NHPI      | 8              | 21          |
| Baby Sex           | Female    | 17             | 21          |
|                    | Male      | 21             | 13          |
| Parity             | 0         | 7              | 3           |
|                    | 1         | 21             | 7           |
|                    | 2         | 9              | 11          |
|                    | More      | 1              | 13          |
| Gravidity          | 1         | 6              | 2           |
|                    | 2         | 15             | 5           |
|                    | 3         | 13             | 8           |
|                    | 4         | 3              | 6           |
|                    | 5         | 1              | 4           |
|                    | More      | 0              | 9           |

940 Demographic and clinical statistics are reported for the control and maternally obese groups.

941 **Table 2. Top 20 hypermethylated CpG sites and top 20 hypomethylated CpG sites.**

| CpG        | Gene    | Island  | Group   | logFC | P.Value  | adj.P.Val | Type  |
|------------|---------|---------|---------|-------|----------|-----------|-------|
| cg12303247 | SYT11   | OpenSea | 3'UTR   | 2.188 | 2.44E-05 | 6.09E-03  | Hyper |
| cg16818768 | PSMG1   | Island  | TSS1500 | 1.605 | 2.15E-05 | 5.74E-03  | Hyper |
| cg05995465 | HDAC4   | OpenSea | 5'UTR   | 1.604 | 1.65E-03 | 4.65E-02  | Hyper |
| cg01937701 | DHRS4   | Island  | TSS200  | 1.592 | 1.96E-10 | 2.45E-05  | Hyper |
| cg22243583 | DLEU1   | S_Shore | Body    | 1.522 | 2.53E-06 | 2.01E-03  | Hyper |
| cg16927136 | RPL35A  | OpenSea | TSS1500 | 1.507 | 2.39E-10 | 2.45E-05  | Hyper |
| cg08899199 | ST7     | S_Shore | Body    | 1.4   | 7.34E-07 | 1.13E-03  | Hyper |
| cg05054115 | DHRS4   | Island  | TSS200  | 1.389 | 6.66E-08 | 3.73E-04  | Hyper |
| cg12878710 | LRCH3   | Island  | TSS200  | 1.387 | 1.27E-06 | 1.48E-03  | Hyper |
| cg05130022 | HMG4    | N_Shore | TSS200  | 1.386 | 1.51E-04 | 1.45E-02  | Hyper |
| cg05643303 | HOXC8   | Island  | TSS200  | 1.345 | 2.70E-05 | 6.34E-03  | Hyper |
| cg07449543 | CHORDC1 | S_Shore | TSS200  | 1.342 | 6.32E-05 | 9.53E-03  | Hyper |
| cg25016112 | DENND3  | OpenSea | Body    | 1.314 | 1.22E-03 | 4.01E-02  | Hyper |
| cg09552166 | MSL2    | N_Shore | TSS200  | 1.296 | 2.30E-05 | 5.92E-03  | Hyper |
| cg01003902 | SAFB2   | Island  | TSS200  | 1.269 | 1.04E-08 | 1.42E-04  | Hyper |
| cg11028445 | FAM96A  | N_Shore | TSS1500 | 1.265 | 1.97E-04 | 1.65E-02  | Hyper |

|            |            |         |         |        |          |          |       |
|------------|------------|---------|---------|--------|----------|----------|-------|
| cg10317138 | ADAM12     | N_Shore | Body    | 1.229  | 5.06E-04 | 2.60E-02 | Hyper |
| cg09757277 | ZNF222     | S_Shore | 5'UTR   | 1.229  | 9.88E-08 | 4.27E-04 | Hyper |
| cg04117338 | CRADD      | N_Shore | 5'UTR   | 1.209  | 1.66E-03 | 4.67E-02 | Hyper |
| cg07354583 | CD69       | OpenSea | Body    | 1.205  | 5.94E-07 | 1.02E-03 | Hyper |
| cg04043455 | EBF3       | S_Shelf | Body    | -2.031 | 6.12E-04 | 0.029    | Hypo  |
| cg20784950 | PLEC1      | N_Shore | Body    | -1.812 | 1.96E-05 | 0.005    | Hypo  |
| cg09976051 | AGA        | N_Shore | Body    | -1.516 | 1.67E-04 | 0.015    | Hypo  |
| cg13862711 | LHX6       | Island  | Body    | -1.469 | 1.65E-03 | 0.047    | Hypo  |
| cg16434331 | SLC39A11   | OpenSea | Body    | -1.411 | 9.52E-08 | 0        | Hypo  |
| cg05636467 | EBF3       | S_Shelf | Body    | -1.335 | 1.65E-03 | 0.047    | Hypo  |
| cg16858146 | TAF3       | S_Shelf | Body    | -1.33  | 3.15E-05 | 0.007    | Hypo  |
| cg24796644 | MDGA1      | Island  | Body    | -1.242 | 1.48E-05 | 0.005    | Hypo  |
| cg11064039 | PRKAR1B    | Island  | 5'UTR   | -1.227 | 1.58E-03 | 0.046    | Hypo  |
| cg06833656 | TBCD       | OpenSea | Body    | -1.219 | 2.68E-06 | 0.002    | Hypo  |
| cg25430507 | NXPH2      | S_Shore | TSS1500 | -1.152 | 2.08E-06 | 0.002    | Hypo  |
| cg03485608 | NXPH2      | N_Shore | Body    | -1.152 | 2.72E-06 | 0.002    | Hypo  |
| cg00928596 | MIR365-1   | OpenSea | TSS200  | -1.148 | 7.32E-05 | 0.01     | Hypo  |
| cg12601963 | NCRNA00200 | Island  | Body    | -1.132 | 2.58E-06 | 0.002    | Hypo  |



|            |            |         |         |        |          |       |      |
|------------|------------|---------|---------|--------|----------|-------|------|
| cg22772691 | SLC12A7    | S_Shelf | Body    | -1.123 | 1.79E-04 | 0.016 | Hypo |
| cg02584267 | EBF3       | OpenSea | Body    | -1.121 | 2.39E-04 | 0.018 | Hypo |
| cg19282259 | NCRNA00200 | Island  | TSS200  | -1.104 | 3.49E-06 | 0.002 | Hypo |
| cg08010094 | NXPH2      | S_Shore | TSS1500 | -1.094 | 1.04E-03 | 0.037 | Hypo |
| cg06916001 | MIR365-1   | OpenSea | TSS200  | -1.088 | 5.74E-05 | 0.009 | Hypo |
| cg03721387 | KRTAP24-1  | OpenSea | 3'UTR   | -1.04  | 4.29E-06 | 0.003 | Hypo |

942 logFC, p-values, BH adjusted p-values, and CpG annotations are reported for the top 20 differentially hypermethylated CpG sites  
 943 ordered by the adjusted p-values by 'limma' packages. Hypermethylated CpG sites are defined as logFC>0, whereas hypomethylated  
 944 CpG sites are defined as logFC<0.

945

946

947

948

949

950

951

# Cohort Collection and Sample Preparation

medRxiv preprint doi: <https://doi.org/10.1101/2024.07.27.24310936>; this version posted August 13, 2024. The copyright holder for this preprint (which was not certified by peer review) is the author/funder, who has granted medRxiv a license to display the preprint in perpetuity. It is made available under a [CC-BY-NC-ND 4.0 International license](https://creativecommons.org/licenses/by-nc-nd/4.0/).

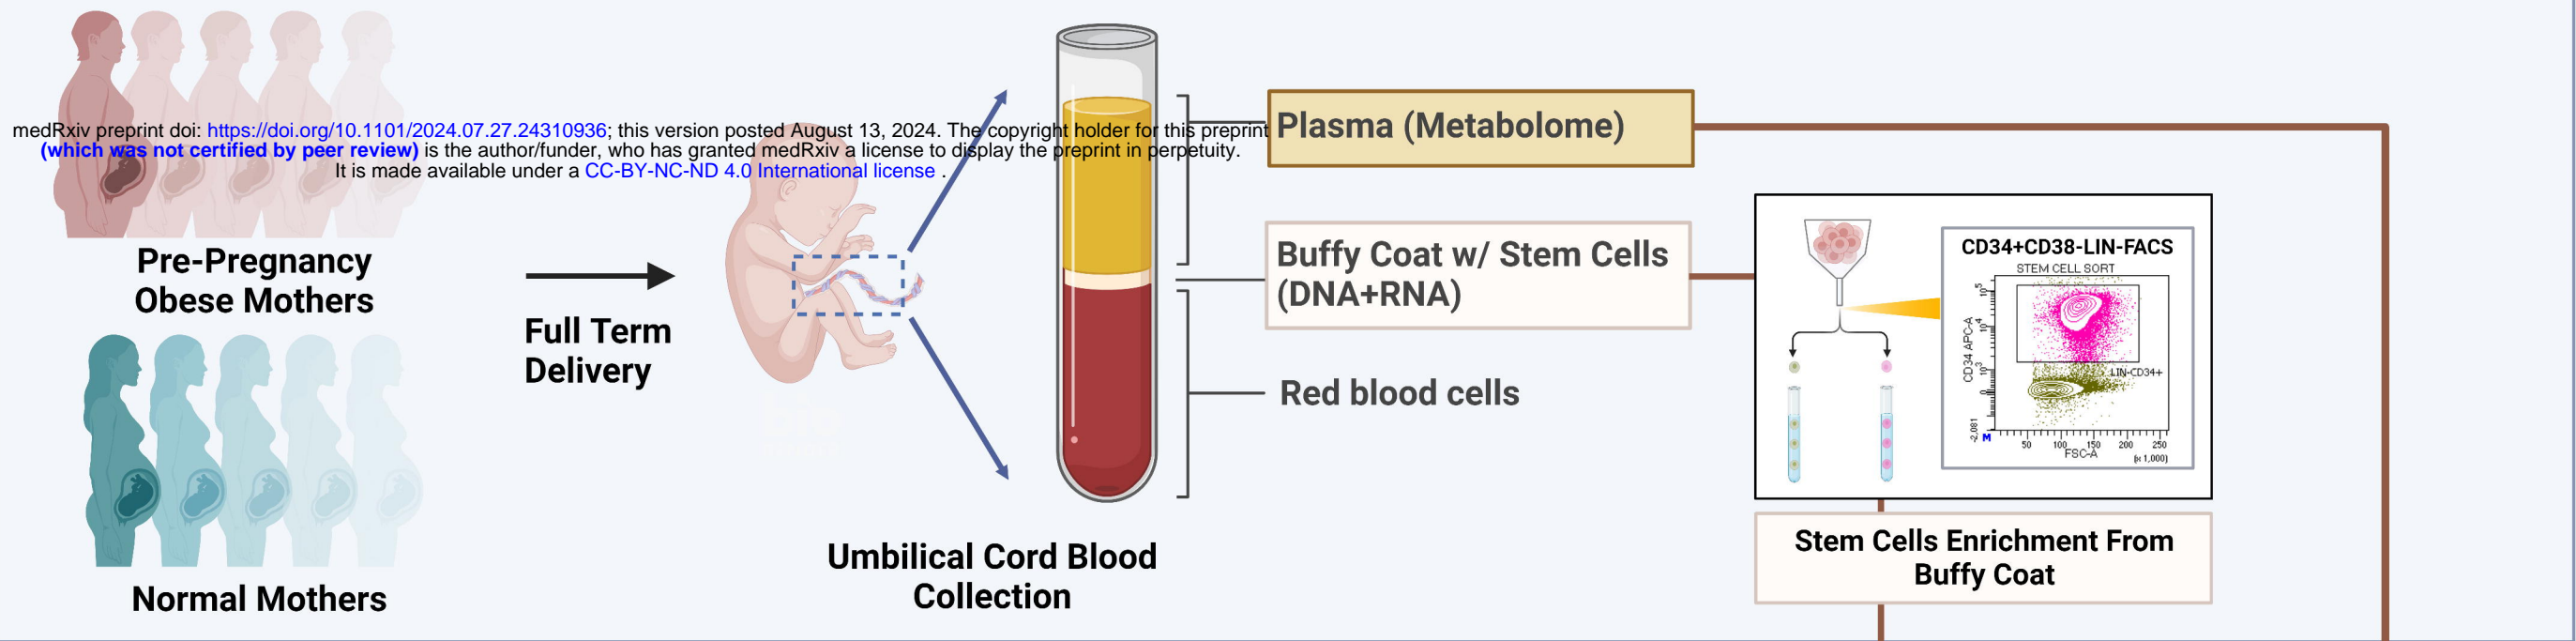

Created with BioRender.com

## 1 Methylation Analyses

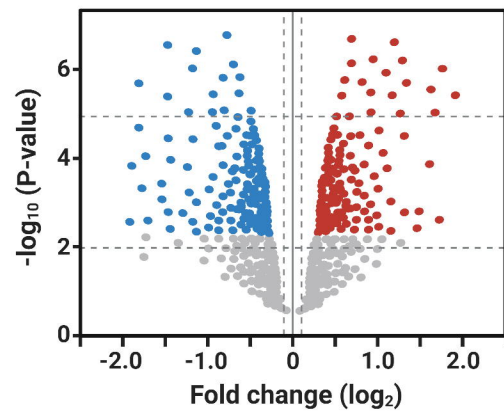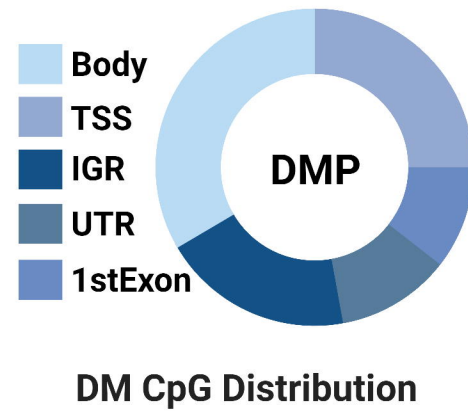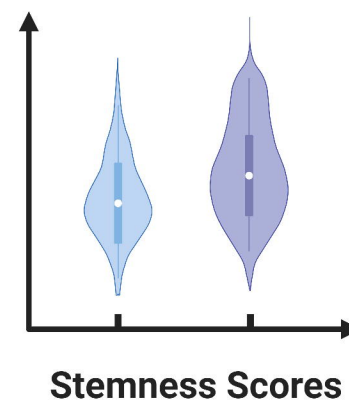

## 2 Multiomics Integration

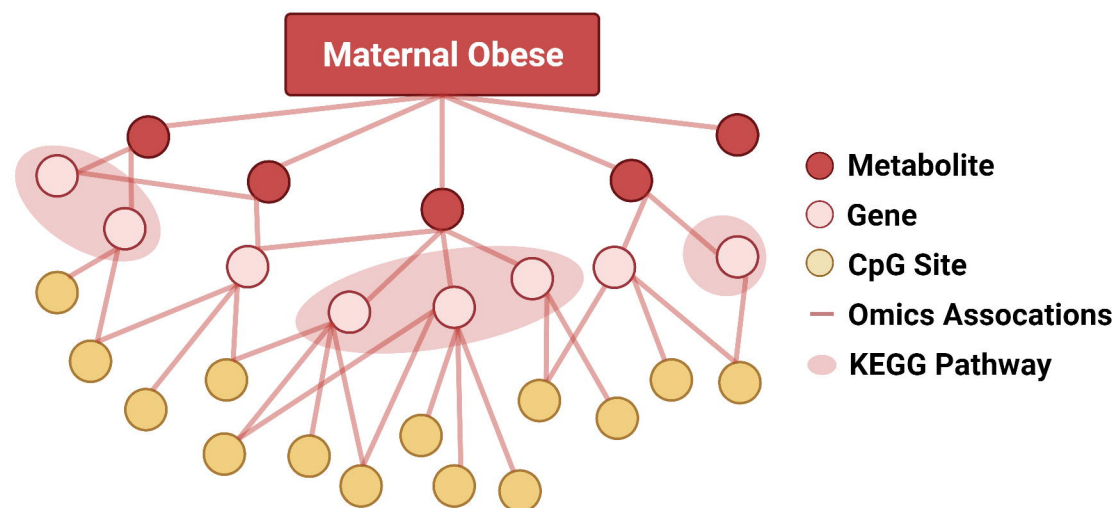

## Downstream Analyses

## Enriched Stem Cells

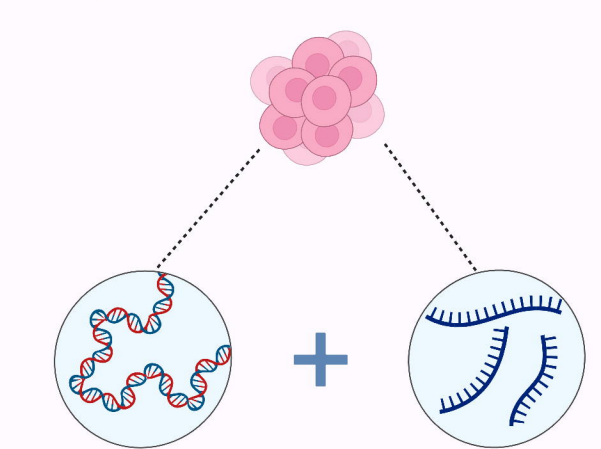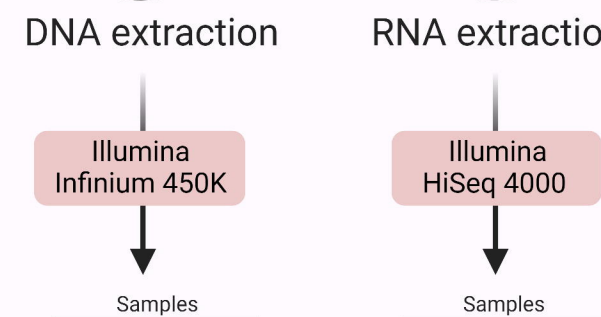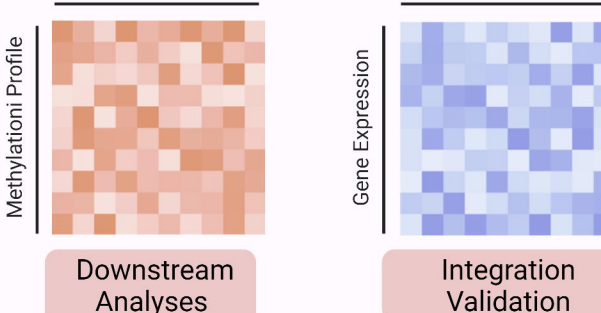

## Plasma

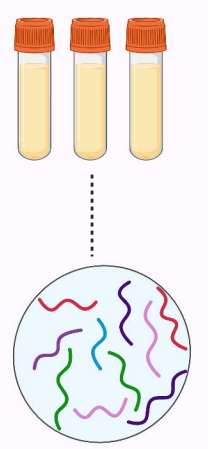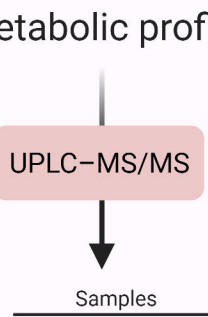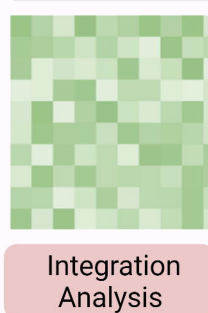

## Molecular Profiling



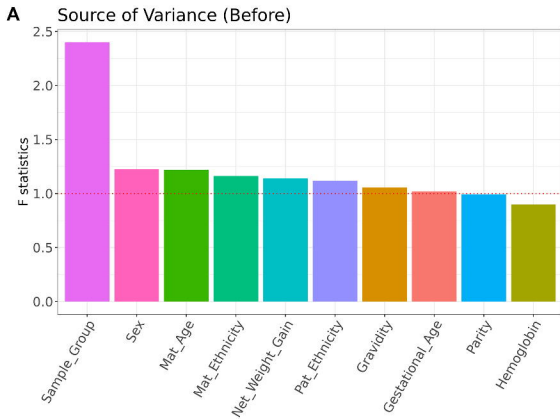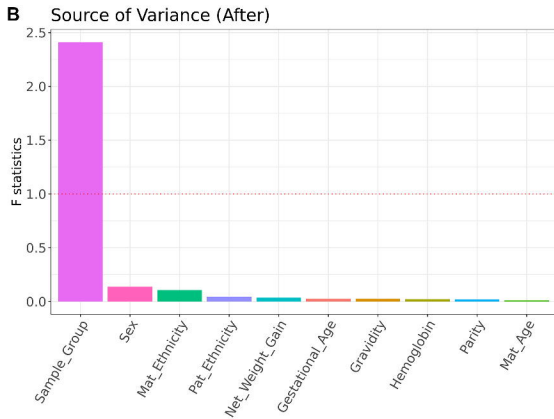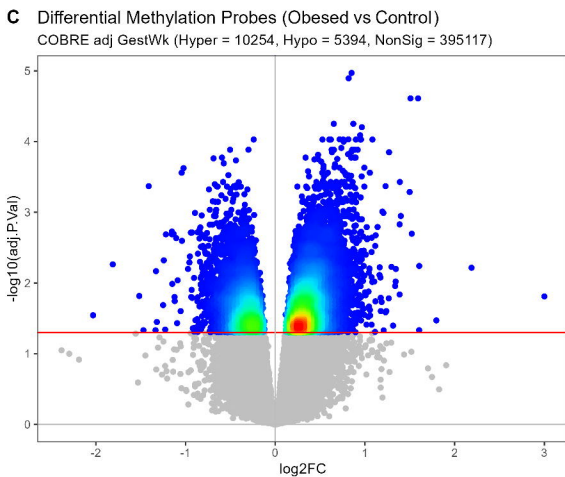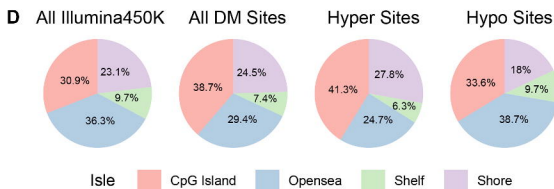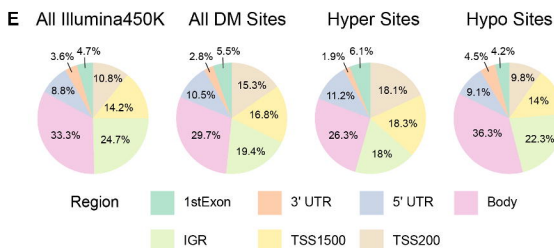



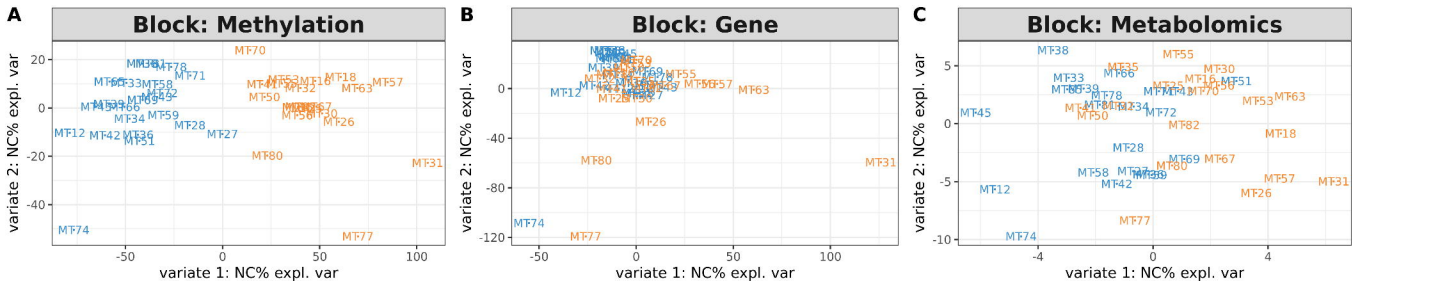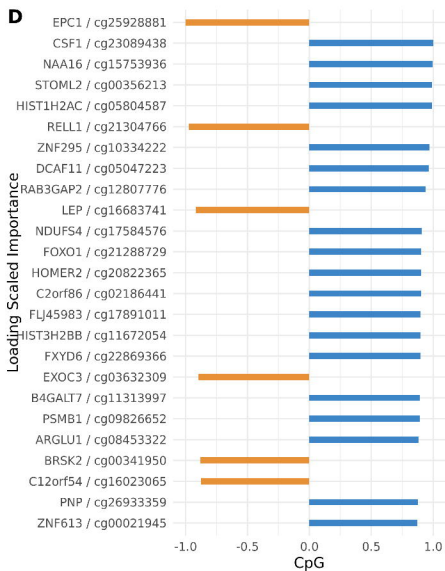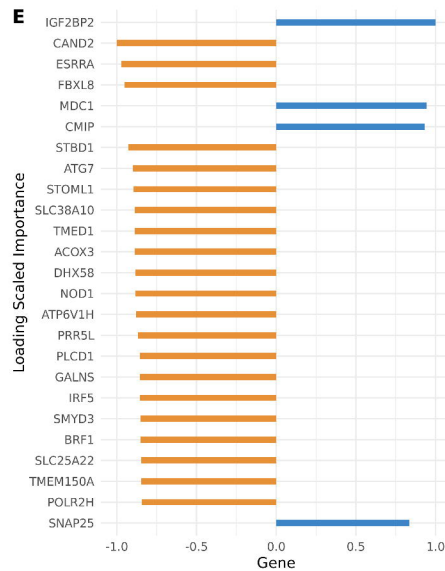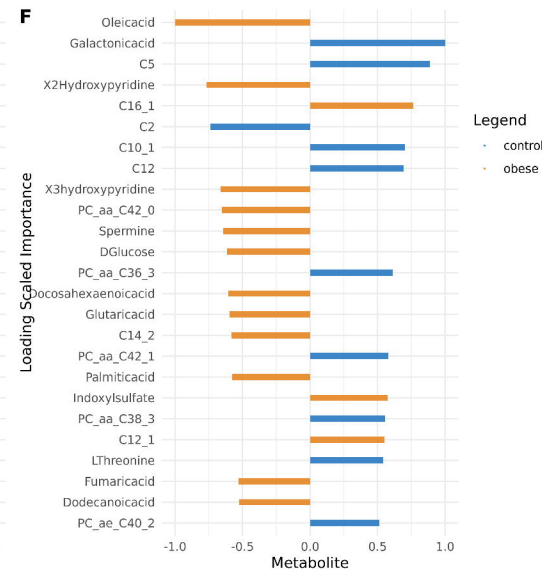



**A** RF Testing ROC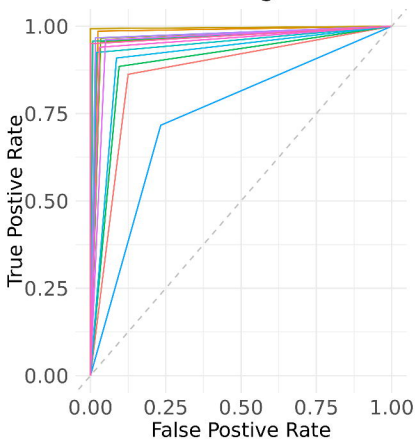**Data**

- BLCA
- KIRC
- PAAD
- BRCA
- KIRP
- PRAD
- COAD
- LIHC
- THCA
- ESCA
- LUAD
- UCEC
- HNSC
- LUSC

**B** TCGA-BLCA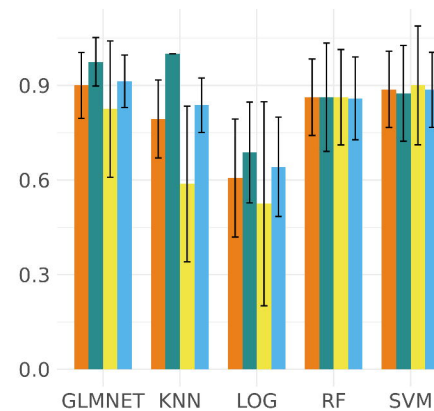**C** TCGA-KIRC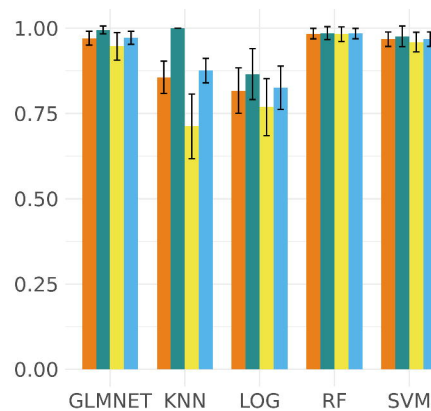**D** TCGA-PAAD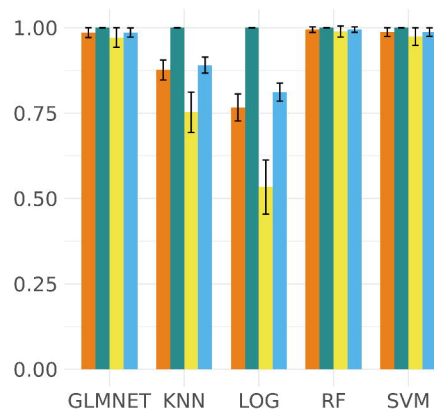**E** TCGA-BRCA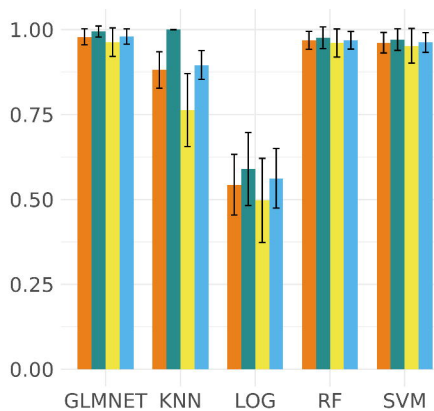**Metric**

- Accuracy
- Sensitivity
- Specificity
- F1

**F** TCGA-KIRP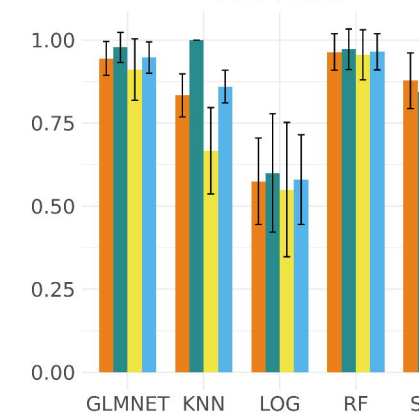**G** TCGA-PRAD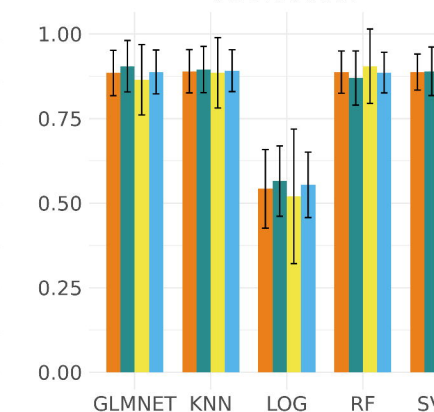**H** TCGA-COAD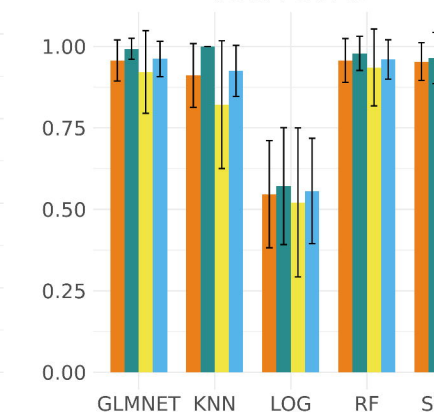**I** TCGA-LIHC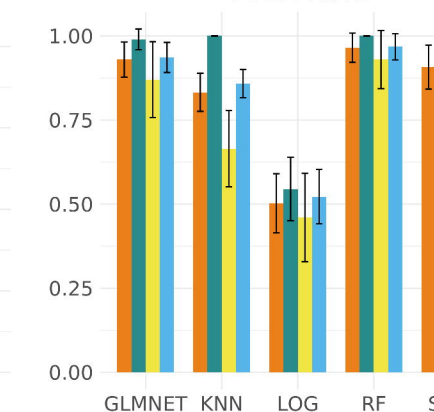**J** TCGA-THCA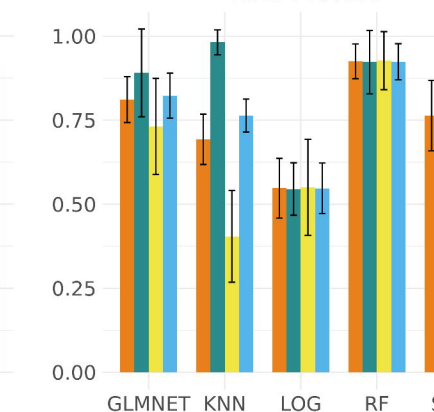**Metric**

- Accuracy
- Sensitivity
- Specificity
- F1

**K** TCGA-ESCA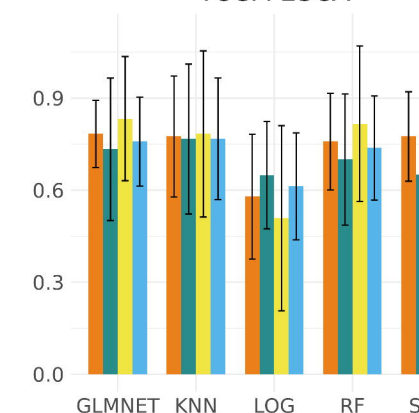**L** TCGA-LUAD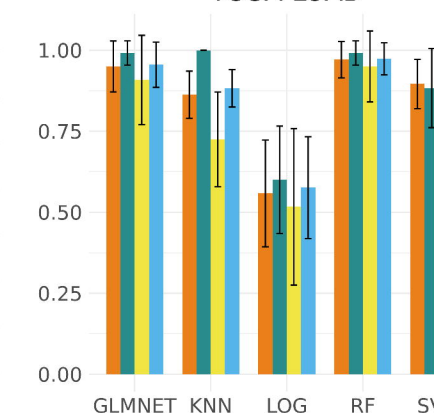**M** TCGA-UCEC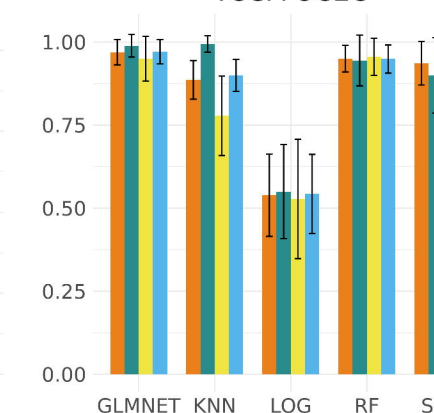**N** TCGA-HNSC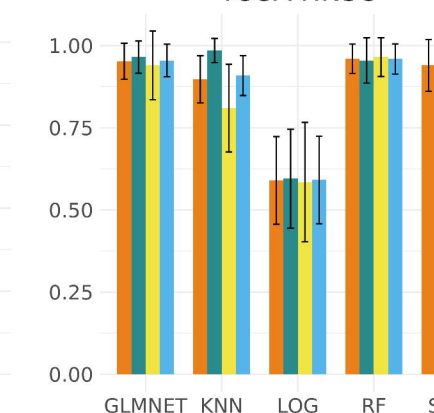**O** TCGA-LUSC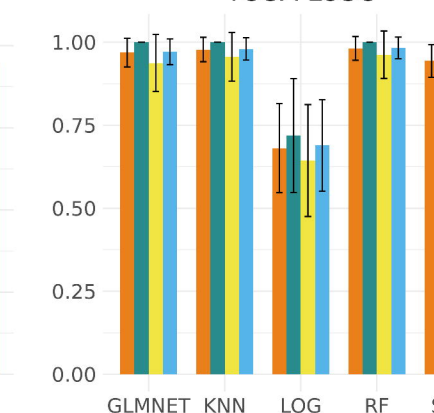**Metric**

- Accuracy
- Sensitivity
- Specificity
- F1

**Maternal obesity**

**Lipid Metabolism**  
(PC aa/ae, Oleic acid)

**Nutrient Deficiency**  
(DHA)

**Pro-inflammatory  
Responses & Immunity**

**Membrane  
damage**

**Cell cycle  
repression**

**Increased uHSC quiescence**

**Oxidative  
Stress**

**Increased  
apoptosis**
